1 **An ancient truncated duplication of the anti-Mullerian hormone receptor type 2**  
2 **gene is a potential conserved master sex determinant in the Pangasiidae**  
3 **catfish family**

4  
5 **Short running title:** An ancient conserved sex determinant in Pangasiids

6  
7 Ming Wen<sup>1,2</sup>, Qiaowei Pan<sup>2,3</sup>, Elodie Jouanno<sup>2</sup>, Jerome Montfort<sup>2</sup>, Margot Zahm<sup>4</sup>, Cédric Cabau<sup>5</sup>,  
8 Christophe Klopp<sup>4,5</sup>, Carole Iampietro<sup>6</sup>, Céline Roques<sup>6</sup>, Olivier Bouchez<sup>6</sup>, Adrien Castinel<sup>6</sup>, Cécile  
9 Donnadiou<sup>6</sup>, Hugues Parrinello<sup>7</sup>, Charles Poncet<sup>8</sup>, Elodie Belmonte<sup>8</sup>, Véronique Gautier<sup>8</sup>, Jean-  
10 Christophe Avarre<sup>9</sup>, Remi Dugue<sup>9</sup>, Rudhy Gustiano<sup>10</sup>, Trần Thị Thúy Hà<sup>11</sup>, Marc Campet<sup>12</sup>, Kednapat  
11 Sriphairoj<sup>13</sup>, Josiane Ribolli<sup>14</sup>, Fernanda L. de Almeida<sup>15</sup>, Thomas Desvignes<sup>16</sup>, John H.,  
12 Postlethwait<sup>16</sup>, Christabel Floi Bucac<sup>3,17</sup>, Marc Robinson-Rechavi<sup>3,17</sup>, Julien Bobe<sup>2</sup>, Amaury Herpin<sup>2</sup>,  
13 Yann Guiguen<sup>2\*</sup>

14  
15 **AFFILIATIONS**

16 <sup>1</sup> State Key Laboratory of Developmental Biology of Freshwater Fish, College of Life Science, Hunan  
17 Normal University, Changsha, China.

18 <sup>2</sup> INRAE, LPGP, 35000 Rennes, France.

19 <sup>3</sup> Department of Ecology and Evolution, University of Lausanne, Lausanne, Switzerland.

20 <sup>4</sup> Plate-forme bio-informatique Genotoul, Mathématiques et Informatique Appliquées de Toulouse,  
21 INRAE, Castanet Tolosan, France.

22 <sup>5</sup> SIGENAE, GenPhySE, Université de Toulouse, INRAE, ENVT, Castanet Tolosan, France.

23 <sup>6</sup> INRAE, US 1426, GeT-PlaGe, Genotoul, Castanet-Tolosan, France.

24 <sup>7</sup> Montpellier GenomiX (MGX), c/o Institut de Génomique Fonctionnelle, 141 rue de la Cardonille,  
25 34094, Montpellier Cedex 05, France.

26 <sup>8</sup> GDEC Gentyane, INRAE, Université Clermont Auvergne, Clermont-Ferrand, France.

27 <sup>9</sup> ISEM, Univ Montpellier, CNRS, IRD, Montpellier, France.

28 <sup>10</sup> Research Institute of Freshwater Fisheries (CRIFI-RIFF), Instalasi Penelitian Perikanan Air Tawar,  
29 Jalan Ragunan-Pasar Minggu, P.O. Box 7220/jkspm, Jakarta 12540, Indonesia.

30 <sup>11</sup> Research Institute for Aquaculture No.1. Dinh Bang, Tu Son, Bac Ninh, Viet Nam.

31 <sup>12</sup> Neovia Asia, HCM city Vietnam.

32 <sup>13</sup> Faculty of Natural Resources and Agro-Industry, Kasetsart University Chalermphrakiat Sakon  
33 Nakhon Province Campus, Sakon Nakhon, Thailand.

34 <sup>14</sup> Laboratório de Biologia e Cultivo de Peixes de Água Doce, Universidade Federal de Santa  
35 Catarina, Florianópolis, SC, Brasil.

36 <sup>15</sup> Embrapa Amazônia Ocidental, Manaus, Amazonas, Brasil.

37 <sup>16</sup> Institute of Neuroscience, University of Oregon, Eugene OR 97403, USA.

38 <sup>17</sup> SIB Swiss Institute of Bioinformatics, 1015 Lausanne, Switzerland.

39

40 \* Corresponding author: Yann Guiguen ([yann.guiguen@inrae.fr](mailto:yann.guiguen@inrae.fr))

41

42 **Key words:** Pangasiid catfishes, *amhr2*, sex determination, male genome assembly, evolution

43

## 44 ABSTRACT

45

46 The evolution of sex determination (SD) mechanisms in teleost fishes is amazingly dynamic, as  
47 reflected by the variety of different master sex-determining genes identified, even sometimes among  
48 closely related species. Pangasiids are a group of economically important catfishes in many South-  
49 Asian countries, but little is known about their sex determination system. Here, we generated novel  
50 genomic resources for 12 Pangasiid species and provided a first characterization of their SD system.  
51 Based on an Oxford Nanopore long-read chromosome-scale high quality genome assembly of the  
52 striped catfish *Pangasianodon hypophthalmus*, we identified a duplication of the anti-Müllerian  
53 hormone receptor type II gene (*amhr2*), which was further characterized as being sex-linked in males  
54 and expressed only in testicular samples. These first results point to a male-specific duplication on  
55 the Y chromosome (*amhr2by*) of the autosomal *amhr2a*. Sequence annotation revealed that the *P.*  
56 *hypophthalmus* *Amhr2by* is truncated in its N-terminal domain, lacking the cysteine-rich extracellular  
57 part of the receptor that is crucial for ligand binding, suggesting a potential route for its  
58 neofunctionalization. Short-read genome sequencing and reference-guided assembly of 11 additional  
59 Pangasiid species, along with sex-linkage studies, revealed that this truncated *amhr2by* duplication is  
60 also conserved as a male-specific gene in many Pangasiids. Reconstructions of the *amhr2* phylogeny  
61 suggested that *amhr2by* arose from an ancient duplication / insertion event at the root of the Siluroidei  
62 radiation that is dated around 100 million years ago. Altogether these results bring multiple lines of  
63 evidence supporting that *amhr2by* is an ancient and conserved master sex-determining gene in  
64 Pangasiid catfishes, a finding that highlights the recurrent usage of the transforming growth factor  $\beta$   
65 pathway in teleost sex determination and brings another empirical case towards the understanding of  
66 the dynamics or stability of sex determination systems.

67

## 68 INTRODUCTION

69

70 Catfishes (Order Siluriformes) with approximately 4,000 species (Sullivan, Lundberg, & Hardman,  
71 2006) are economically and ecologically important fish worldwide. Among catfishes, the Pangasiid  
72 family (Pangasiidae) is recognized as a monophyletic group including four extant genera, i.e.,  
73 *Helicophagus*, *Pangasianodon*, *Pangasius* and *Pteropangasius* (Pouyaud, Gustiano, & Teugels,  
74 2016). These species have a wide range of habitats both in fresh and brackish water across southern  
75 Asia, from Pakistan to Borneo (Roberts & Vidthayanon, 1991). Many Pangasiids, because of their  
76 rapid growth rate, are also important aquaculture species, such as *Pangasius bocourti*, *Pangasius*

77 *djambal* and *Pangasianodon hypophthalmus* (Lazard, Cacot, Slembrouck, & Legendre, 2009). *P.*  
78 *hypophthalmus*, for example, has become a major aquaculture species extensively farmed in many  
79 Asian countries (Anka, Faruk, Hasan, & Azad, 2014; Na-Nakorn & Moeikum, 2009, p.; Phuong &  
80 Oanh, 2010; Singh & Lakra, 2012) and has even been recently introduced in the Brazilian finfish  
81 aquaculture.

82 Sex determination (SD) mechanisms have not been investigated in detail in Pangasiid catfishes, but  
83 genetic sex-linked markers that could facilitate broodstock management for aquaculture or  
84 conservation purposes, have been searched without success in both *P. hypophthalmus* and *P. gigas*  
85 (Sriphairoj, Na-Nakorn, Brunelli, & Thorgaard, 2007). SD in vertebrates can rely on genetic (GSD  
86 for genetic SD), environmental (ESD for environmental SD) or a combination of both genetic and  
87 environmental factors (such as thermal effects on GSD = GSD+TE) (Baroiller, D’Cotta, & Saillant,  
88 2009; Kobayashi, Nagahama, & Nakamura, 2013; Ospina-Alvarez & Piferrer, 2008). In teleost fishes,  
89 SD has been found to be extremely plastic with both GSD, ESD and GSD+TE systems. In addition,  
90 teleosts exhibit a wide range of GSD systems, with both classical male (XX/XY) and female  
91 heterogamety (ZZ/ZW), but also more complex GSD systems relying on polygenic SD with or  
92 without multiple sex chromosomes (Devlin & Nagahama, 2002; Mank & Avise, 2009; Moore &  
93 Roberts, 2013). These transitions or turnovers of different GSD systems have been found in closely  
94 related species belonging to the same genus (Takehana, Hamaguchi, & Sakaizumi, 2008) and even  
95 across populations of the same species (Kallman, 1973). A similar high turnover has also been found  
96 for master sex determining (MSD) genes at the top of the genetic sex determination cascade (Matsuda  
97 et al., 2002; Myosho et al., 2012; Nanda et al., 2002; Q. Pan et al., 2016; Takehana et al., 2014). Many  
98 of these fish MSD genes belong to the “usual suspect” category (Herpin & Schartl, 2015) because  
99 they derived from key genes regulating the gonadal sex differentiation network. These “usual  
100 suspect” MSD genes currently belong to a few gene families, like the *Dmrt* (Chen et al., 2014;  
101 Matsuda et al., 2002; Nanda et al., 2002), *Sox* (Takehana et al., 2014), steroid-pathway (Koyama et  
102 al., 2019; Purcell et al., 2018) and Transforming Growth Factor beta (TGF $\beta$ ) families (Q. Pan et al.,  
103 2021), which have been independently and recurrently used to generate new MSD genes. The greatest  
104 diversity of MSD genes is found within the TGF $\beta$  family with the anti-mullerian hormone, *amh*  
105 (Hattori et al., 2012; M. Li et al., 2015; Q. Pan et al., 2019), the gonadal soma derived factor, *gsdf*  
106 (Myosho et al., 2012; Rondeau et al., 2013), or the growth/differentiation factor 6, *gdf6* (Imarazene  
107 et al., 2021; Reichwald et al., 2015) genes, but also TGF- $\beta$  type II and type I receptors with the anti-  
108 Mullerian hormone receptor type 2, *amhr2* (Feron et al., 2020; Kamiya et al., 2012) and the bone  
109 morphogenetic protein receptor, type IBb, *bmpr1bb* (Rafati et al., 2020) genes. However, a few  
110 exceptions to the “usual suspects” rule have also been identified with, for instance, the conserved

111 salmonid MSD *sdY* gene that evolved from an immunity-related gene (Bertho, Herpin, Schartl, &  
112 Guiguen, 2021; Yano et al., 2012, 2013).

113 Based on a chromosome-scale high quality genome assembly, and previously published whole-organ  
114 transcriptomic data (Pasquier et al., 2016) of *Pangasianodon hypophthalmus*, we identified a male-  
115 specific duplication of *amhr2* (*amhr2by*) in that species. This potential Y chromosome-specific  
116 *amhr2by* encodes an N-terminal truncated protein that lacks the cysteine-rich extracellular part of the  
117 receptor, which is key for proper Amh ligand binding. Sex-linkage studies and genome sequencing  
118 of 11 additional Pangasiid species show that *amhr2by* is conserved as a male-specific gene in at least  
119 four Pangasiid species, stemming from a single ancient duplication / insertion event at the root of the  
120 Siluroidei suborder radiation that is dated around 100 million years ago (Kappas, Vittas, Pantzartzi,  
121 Drosopoulou, & Scouras, 2016). Together, these results bring multiple lines of evidence supporting  
122 the hypothesis that *amhr2by* is potentially an ancient and conserved master sex-determining gene in  
123 Pangasiid catfishes and highlight the recurrent usage of the transforming growth factor  $\beta$  pathway in  
124 teleost sex determination.

125

## 126 MATERIAL AND METHODS

127

### 128 Samples collection

129

130 For high-quality genome reference sequencing, a single *P. hypophthalmus* male was sampled from  
131 captive broodstock populations originating from Indonesia and maintained in the experimental  
132 facilities of ISEM (Institut des Sciences de l'Evolution de Montpellier, France). High molecular  
133 weight (HMW) genomic DNA (gDNA) was extracted from a 0.5-ml blood sample stored in a TNES-  
134 Urea lysis buffer (TNES-Urea: 4 M urea; 10 mM Tris-HCl, pH 7.5; 125 mM NaCl; 10 mM EDTA;  
135 1% SDS). HMW gDNA was then purified using a slightly-modified phenol-chloroform extraction  
136 (Q. Pan et al., 2019). For the chromosome contact map (Hi-C), 1.5 ml of blood was taken from the  
137 same animal and slowly cryopreserved with 15 % dimethyl sulfoxide (DMSO) in a Mr. Frosty  
138 Freezing Container (Thermo Scientific) at -80°C. For sex-linkage analyses and short-read genome  
139 sequencing, fin clips were sampled and stored in 90% ethanol. *P. djambal* fin clips were sampled  
140 from captive broodstock populations originating from Indonesia and maintained in the experimental  
141 facilities of ISEM. *P. gigas* fin clips were sampled on broodstock populations kept for a restocking  
142 program in Thailand. *P. bocourti* and *P. conchophilus* fin clips were sampled at market places in  
143 Vietnam. *P. elongatus*, *P. siamensis*, *P. macronema*, *P. larnaudii*, *P. mekongensis*, and *P. krempfi*

144 were wild samples collected in Vietnam. *P. sanitwongsei* fin clip samples were obtained through the  
145 aquaculture trade and their precise origin is unknown.

146

## 147 **Chromosome-scale genome sequencing and assembly of *P. hypophthalmus***

### 148 **Oxford Nanopore sequencing**

149 All library preparations and sequencing were performed using Oxford Nanopore Ligation Sequencing  
150 Kits SQK-LSK108 and SQK-LSK109 according to the manufacturer's instructions (Oxford  
151 Nanopore Technologies). For the SQK-LSK108 sequencing Kit, 90 µg of DNA was purified then  
152 sheared to 20 kb fragments using the megaruptor1 system (Diagenode). For each library, a DNA-  
153 damage repair step was performed on 5 µg of DNA. Then an END-repair-dA-tail step was performed  
154 for adapter ligation. Libraries were loaded onto nine R9.4.1 flowcells and sequenced on a GridION  
155 instrument at a concentration of 0.1 pmol for 48 h. For the SQK-LSK109 sequencing Kit, 10 µg of  
156 DNA was purified then sheared to 20 kb fragments using the megaruptor1 system (Diagenode). For  
157 this library, a one-step DNA-damage repair + END-repair-dA-tail procedure was performed on 2 µg  
158 of DNA. Adapters were then ligated to DNAs in the library. The library was loaded onto one R9.4.1  
159 flowcell and sequenced on a GridION instrument at a concentration of 0.08 pmol for 48h.

### 160 **10X Genomics sequencing**

161 The Chromium library was prepared according to 10X Genomics' protocols using the Genome  
162 Reagent Kit v2. The library was prepared from 10 ng of high molecular weight (HMW) gDNA.  
163 Briefly, in the microfluidic Genome Chip, a library of Genome Gel Beads, was combined with HMW  
164 template gDNA in master mix and partitioning oil to create Gel Bead-In-EMulsions (GEMs) in the  
165 Chromium apparatus. Each Gel Bead was then functionalized with millions of copies of a 10x™  
166 barcoded primer. Dissolution of the Genome Gel Bead in the GEM released primers containing (i) an  
167 Illumina R1 sequence (Read 1 sequencing primer), (ii) a 16 bp 10x Barcode, and (iii) a 6 bp random  
168 primer sequence. The R1 sequence and the 10x™ barcode were added to the molecules during the  
169 GEM incubation. P5 and P7 primers, R2 sequence, and Sample Index were added during library  
170 construction. 10 cycles of PCR were applied to amplify the library. The library was sequenced on an  
171 Illumina HiSeq3000 using a paired-end format with read length of 150 bp with the Illumina  
172 HiSeq3000 sequencing kits.

### 173 **Hi-C sequencing**

174 Hi-C library generation was carried out according to a protocol adapted from Rao et al. 2014 (Foissac  
175 et al., 2019). The blood sample was spun down, and the cell pellet was resuspended and fixed in 1%  
176 formaldehyde. Five million cells were processed for the Hi-C library. After overnight digestion with  
177 HindIII (NEB), DNA ends were labeled with Biotin-14-DCTP (Invitrogen) using the klenow (NEB)  
178 and religated. In total, 1.4 µg of DNA was sheared to an average size of 550 bp (Covaris). Biotinylated  
179 DNA fragments were pulled down using M280 Streptavidin Dynabeads (Invitrogen) and ligated to  
180 PE adaptors (Illumina). The Hi-C library was amplified using PE primers (Illumina) with 10 PCR  
181 amplification cycles. The library was sequenced using a HiSeq3000 (Illumina, California, USA) in  
182 150 bp paired-end format.

183

## 184 **Genome assembly**

185

186 GridION data were trimmed using Porechop v0.2.1 (<https://github.com/rrwick/Porechop>) and filtered  
187 using NanoFilt v2.2.0 (De Coster, D'Hert, Schultz, Cruts, & Van Broeckhoven, 2018) with the  
188 parameters `-l 3000` and `-q 7`. A *de novo* assembly was constructed with SmartDeNovo (Ruan,  
189 2015/2019), Wtdbg2 v2.1 (Ruan & Li, 2020) and flye v2.3.7 (Kolmogorov, Yuan, Lin, & Pevzner,  
190 2019), each with default parameters. The resulting assembly metrics were compared, and the draft  
191 assembly with the best metrics generated by SmartDeNovo was kept and used as reference. This  
192 assembly was then further corrected using long reads. After mapping the trimmed and filtered  
193 GridION reads with minimap2 v2.11 (H. Li, 2018) with parameter `-x map-ont`, the assembly was  
194 polished using Racon (Vaser, Sović, Nagarajan, & Šikić, 2017) v1.3.1 with default parameters for  
195 three rounds. The assembly was then corrected using short reads. After mapping 10X short reads with  
196 Long Ranger v2.1.1, Pilon (Walker et al., 2014) v1.22 was run with parameters `--fix bases,gaps --`  
197 `changes`. Again, three rounds of these short reads polishing were performed. The final polished  
198 genome assembly was then scaffolded using Hi-C information. Reads were aligned to the draft  
199 genome using Juicer (Durand, Shamim, et al., 2016) with default parameters. A candidate assembly  
200 was then generated with 3D de novo assembly (3D-DNA) pipeline (Dudchenko et al., 2017) with the  
201 `-r 0` parameter. The candidate assembly was manually reviewed using Juicebox (Durand, Robinson,  
202 et al., 2016) assembly tools. Gaps in this chromosome scaled assembly were filled using GapCloser  
203 ([https://github.com/CAFS-bioinformatics/LR\\_Gapcloser](https://github.com/CAFS-bioinformatics/LR_Gapcloser)) v1.1 with default parameters. Reads used  
204 to fill these gaps were GridION and PromethION reads filtered with NanoFilt and then corrected with  
205 Canu (Koren et al., 2017) v1.6 using parameters `--correct genomeSize = 753m --nanopore-raw`. The  
206 assembly was then corrected one last time using short reads polishing pipeline.

## 207 **Genome analysis and protein-coding gene annotation**

208 K-mer-based estimation of the genome size was carried out with GenomeScope (Vurture et al., 2017)  
209 v2.0. 10X reads were processed with Jellyfish v1.1.11 (Marçais & Kingsford, 2011) to count 21-mer  
210 with a max k-mer coverage of 10,000 and 1,000,000. BUSCO (Simão, Waterhouse, Ioannidis,  
211 Kriventseva, & Zdobnov, 2015) v3.0.2 was run with parameters –species zebrafish and –limit 10 on  
212 the single-copy orthologous gene library from the actinopterygii lineage. The first annotation step  
213 was to identify repetitive content using RepeatMasker v4.0.7 (<https://www.repeatmasker.org/>), Dust  
214 (Morgulis, Gertz, Schäffer, & Agarwala, 2006), and TRF v4.09 (Benson, 1999). A species-specific  
215 *de novo* repeat library was built with RepeatModeler v1.0.11  
216 (<http://www.repeatmasker.org/RepeatModeler/>) and repeated regions were located using  
217 RepeatMasker with the *de novo* and *Danio rerio* libraries. Bedtools v2.26.0 (Quinlan & Hall, 2010)  
218 was used to merge repeated regions identified with the three tools and to soft mask the genome. The  
219 Maker3 genome annotation pipeline v3.01.02-beta (Holt & Yandell, 2011) combined annotations and  
220 evidence from three approaches: similarity with fish proteins, assembled transcripts, and *de novo* gene  
221 predictions. Protein sequences from 11 fish species (*Astyanax mexicanus*, *Danio rerio*, *Gadus*  
222 *morhua*, *Gasterosteus aculeatus*, *Lepisosteus oculatus*, *Oreochromis niloticus*, *Oryzias latipes*,  
223 *Poecilia formosa*, *Takifugu rubripes*, *Tetraodon nigroviridis*, *Xiphophorus maculatus*) found in  
224 Ensembl were aligned to the masked genome using Exonerate v2.4 (Slater & Birney, 2005). RNA-  
225 Seq reads of *P. hypophthalmus* (NCBI BioProject PRJNA256973) from the PhyloFish project  
226 (Pasquier et al., 2016) were used for genome annotation and aligned to the chromosomal assembly  
227 using STAR v2.5.1b (Dobin et al., 2013) with outWigType and outWigStrand options to output signal  
228 wiggle files. Cufflinks v2.2.1 (Trapnell et al., 2010) was used to assemble the transcripts that were  
229 used as RNA-seq evidence. Braker v2.0.4 (Hoff, Lange, Lomsadze, Borodovsky, & Stanke, 2016)  
230 provided *de novo* gene models with wiggle files provided by STAR as hint files for GeneMark (Hoff  
231 et al., 2016) and Augustus (Stanke et al., 2006) training. The best supported transcript for each gene  
232 was chosen using the quality metric called Annotation Edit Distance (AED) (Eilbeck, Moore, Holt,  
233 & Yandell, 2009).

## 234 **miRNA gene and mature miRNA annotation**

235 Small RNA Illumina sequencing libraries were prepared using the NEXTflex Small RNA-Seq Kit v3  
236 (PerkinElmer) following the manufacturer's instructions and starting with the same total RNA  
237 extracts as for the Phylofish project (Pasquier et al., 2016). Total RNA was extracted using Trizol  
238 reagent (Euromedex, France) according to the manufacturer's instructions. Libraries were sequenced



239 on an Illumina HiSeq 2500 sequencer and raw reads were pre-processed using CUTADAPT version  
240 3.4 (Martin, 2011). All eight adult organ libraries (brain, gills, heart ventricle, skeletal muscle,  
241 intestine, liver, ovary and testis) were simultaneously analyzed using *Prost!* (Thomas Desvignes,  
242 Batzel, Sydes, Eames, & Postlethwait, 2019) selecting for read length 17 to 25 nucleotides and with  
243 a minimum of five identical reads. Reads were then aligned to the species' reference genome using  
244 *bbmapskimmer.sh* version 37.85 of the BMAP suite (<https://sourceforge.net/projects/bbmap/>). Gene  
245 and mature miRNA annotations were performed as previously described (Thomas Desvignes et al.,  
246 2019) based on established miRNA gene orthologies among ray-finned fish species (Thomas  
247 Desvignes, Sydes, Montfort, Bobe, & Postlethwait, 2021) and using previously published miRNA  
248 annotations in spotted gar, zebrafish, three-spined stickleback, Japanese medaka, shortfin molly and  
249 blackfin icefish as reference (Braasch et al., 2016; Thomas Desvignes et al., 2019, 2021; Kelley et  
250 al., 2021; B.-M. Kim et al., 2019). miRNA and isomiR nomenclature follow the rules established for  
251 zebrafish (T. Desvignes et al., 2015).

252

## 253 **Short-read sequencing and genome-guided assemblies of other Pangasiids**

### 254 **Short-read sequencing**

255

256 The *P. gigas* and *P. djambal* genomes were sequenced using an Illumina 2x250 bp format. DNA  
257 library construction was performed according to the manufacturer's instruction using the Truseq  
258 DNA nano library prep kit (Illumina). Briefly, gDNA was quantified using the HS dsDNA Assay kit  
259 on the Qubit (Invitrogen). 200 ng of gDNA were sonicated on a Bioruptor (Diagenode). Sonicated  
260 gDNA was end repaired and size selected on magnetic beads aiming for fragments of an average size  
261 of 550 pb. Selected fragments were adenylated on their 3' ends before ligation of Illumina's indexed  
262 adapters. The library was amplified using 8 PCR cycles and verified on a Fragment Analyzer using  
263 the HS NGS fragment kit (Agilent). The library was quantified by qPCR using the KAPA Library  
264 quantification kit (Roche, ref. KK4824) and sequenced on half a lane of Hiseq2500 in paired end  
265 2x250nt using the clustering and SBS rapid kit following the manufacturer's instructions. All other  
266 species were sequenced using an Illumina 2x150 bp strategy according to Illumina's protocols using  
267 the Illumina TruSeq Nano DNA HT Library Prep Kit. Briefly, DNA was fragmented by sonication,  
268 size selection was performed using SPB beads (kit beads) and adaptors were ligated to be sequenced.  
269 Library quality was assessed using an Advanced Analytical Fragment Analyzer and libraries were  
270 quantified by qPCR using the Kapa Library Quantification Kit. DNA-seq experiments were  
271 performed on one Illumina NovaSeq S4 lane using a paired-end read length of 2x150 bp with the  
272 Illumina NovaSeq6000 Reagent Kits.

273

274

## Assembly and annotation

275

276 The *P. gigas* and *P. djambal* genomes were assembled from 2x250 bp short reads using the  
277 DiscovarDeNovo assembler (<https://github.com/bayolau/discovardenovo/>) with default parameters.  
278 For *P. sanitwongsei*, *P. conchophilus*, *P. bocourti*, *P. larnaudii*, *P. mekongensis*, and *P. krempfi*,  
279 2x150 bp reads were assembled using SPADes v.3.11.1 (Bankevich et al., 2012) and then purged  
280 using purge\_dups (Guan et al., 2020). The *P. elongatus*, *P. macronema* and *P. siamensis* 2x150 bp  
281 short reads were assembled with SPADes v.3.14.1 instead of v.3.11.1 because of a higher individual  
282 genome heterozygosity (> 1%), followed by a more stringent purge with Redundans v0.14a (Pryszcz  
283 & Gabaldón, 2016). All these species were then assembled into pseudo-chromosomes using a  
284 reference-guided strategy and the “query assembled as reference” function from DGenies v1.2.0  
285 (Cabanettes & Klopp, 2018), and the GENO\_Phyp\_1.0 *P. hypophthalmus* assembly used as a  
286 reference. Genes from the NCBI annotation of GENO\_Phyp\_1.0 were then mapped to chromosome-  
287 scale assemblies using Liftoff (Shumate & Salzberg, 2021).

288

## Species and gene phylogenies

290

291 Whole-genome species phylogeny analysis was carried out with protein gene annotation from our 12  
292 Pangasidae species combined with protein sequences from *Ictalurus punctatus* (siluriformes) as a  
293 Pangasidae outgroup species. Outgroup species protein sequences were retrieved from Ensembl  
294 release 103 (Howe et al., 2021). Orthogroups were identified using OrthoFinder (Emms & Kelly,  
295 2019), followed by multiple sequence alignment of concatenated one-to-one orthologs (n = 8151)  
296 using MAFFT version 7.475 (Katoh & Standley, 2013). Species tree inference was performed via IQ-  
297 TREE 2 (Minh et al., 2020), the latter using a standard non-parametric bootstrap (r = 100).

298

299 Gene and protein phylogenetic reconstructions were performed on all *amhr2*/Amhr2 homologous  
300 sequences from 28 catfish species along with *amhr2* sequences from *Astyanax mexicanus*  
301 (characiformes) and *Electrophorus electricus* (gymnotiformes) as siluriformes outgroups (. Full-  
302 length CDS were predicted based on their genomic and protein sequence annotation or retrieved from  
303 GenBank (see Table S2 and multi-fasta files of these sequences are publicly available at  
304 <https://doi.org/10.15454/M3HYAX>). To verify the tree topology of *amhr2*/Amhr2 homologs, besides  
305 complete protein and cDNA sequences, we also constructed phylogenetic trees with only the first and  
306 second codons of the coding sequences (Lemey, 2009). All putative CDS and protein sequences were

307 then aligned using MAFFT (version 7.450) (Kato & Standley, 2013). Residue-wise confidence  
308 scores were computed with GUIDANCE 2 (Sela, Ashkenazy, Kato, & Pupko, 2015), and only well-  
309 aligned residues with confidence scores above 0.99 were retained. Phylogenetic relationships among  
310 the *amhr2* sequences were inferred with both maximum-likelihood implemented in IQ-TREE  
311 (version 1.6.7) (Minh et al., 2020), and Bayesian methods implemented in Phylobayes (version 4.1)  
312 (Lartillot, Lepage, & Blanquart, 2009). More precisely, alignment files from either full-length cDNA,  
313 third-codon-removed cDNA, or full-length proteins were used for model selection and tree inference  
314 with IQ-TREE (version 1.6.7) (Minh et al., 2020) with 1000 bootstraps and the 1000 SH-like  
315 approximate likelihood ratio test for robustness. The same alignment files were run in a Bayesian  
316 framework with Phylobayes (version 4.1) (Lartillot et al., 2009) using the CAT-GTR model with  
317 default parameters, and two chains were run in parallel for approximately 2000 cycles with the first  
318 500 cycles discarded as burnt-in until the average standard deviation of split frequencies remained  $\leq$   
319 0.001. The resulting phylogenies were visualized with Figtree (version 1.44).

320

### 321 **Selection analysis on *amhr2* sequences**

322 Selection analysis was performed on the *amhr2* phylogeny using Godon (Davydov, Salamin, &  
323 Robinson-Rechavi, 2019). Analyses were performed separately for (a) exons conserved in both  
324 *amhr2a* and *amhr2by* (“conserved exons”) and (b) the exon region found only in *amhr2a* (“first  
325 exons”). Three codon models were used: M8 (Yang, Nielsen, Goldman, & Pedersen, 2000), M8 with  
326 codon gamma rate variation (Davydov et al., 2019), and the branch-site model (Zhang, Nielsen, &  
327 Yang, 2005) (conserved exons only). For the branch-site model, the branch leading to the *amhr2by*  
328 clade was set as the foreground branch.

329

### 330 **Transcriptome analyses**

331 Reads from *P. hypophthalmus* adult organs and embryos (Pasquier et al., 2016) were mapped on the  
332 complete *P. hypophthalmus* reference transcriptome using bwa mem version 0.7.17 (H. Li, 2013).  
333 Unique mapped reads were then filtered and a raw count matrix was generated with htseq-count  
334 (Anders, Pyl, & Huber, 2015) and normalized using DESeq2 (Love, Huber, & Anders, 2014). Genes  
335 of interest were extracted from this complete transcriptome dataset and missing values were replaced  
336 by a minimal value (0.1) in the normalized raw count matrix. Hierarchical classification was carried  
337 out after log transformation and gene median centering using the cluster 3.0 software (de Hoon,  
338 Imoto, Nolan, & Miyano, 2004) with an uncentered correlation similarity metric and an average  
339 linkage clustering method.

340

### 341 **Read-coverage analyses around the *amhr2a* and *amhr2by* loci in Pangasiids**

342 To assess whether *amhr2by* is a potential Y specific gene in species for which whole genome  
343 sequencing was only obtained from one sample, we computed the read coverage throughout the  
344 genome and extracted the read coverage information around the *amhr2a* and *amhr2by* loci. In *P.*  
345 *hypophthalmus*, ONT reads were mapped on its own genome assembly using minimap version 2.11  
346 (H. Li, 2018). In other Pangasiids, Illumina pair-end reads were mapped onto the *P. hypophthalmus*  
347 genome assembly using bwa version 0.7.17 (H. Li, 2013), indexed using samtools version 1.8 (H. Li  
348 et al., 2009) and sorted by PICARD SortSam. Then a pileup file was generated using samtools  
349 mpileup (H. Li et al., 2009) with per-base alignment quality disabled and (-B). Subsequently, a sync  
350 file containing the nucleotide composition for each position in the reference was created from the  
351 pileup file using popoolation mpileup2sync version 1.201 with a min quality of 20 (-min-qual 20)  
352 (Kofler, Pandey, & Schlötterer, 2011). Read depth was then calculated in a 10 kb non-overlapping  
353 window using PSASS (version 2.0.0, doi:10.5281/zenodo.2615936).

354

### 355 **Primer design**

356 *P. hypophthalmus amhr2a* and *amhr2by* genes were aligned with bioedit version 7.0.5.3 and specific  
357 primers were designed based on this alignment to select highly divergent positions for each paralog.  
358 Selected primer sequences were forward: 5'-GGAGTCTATAAACCCGTGGTAGC-3', and reverse:  
359 5'-CTATGTCACGCTGAACCTCCAGTGT-3' (expected amplicon size: 153 bp) for the *amhr2by*  
360 gene and forward: 5'-GGAGTCTATAAGCCAGCGGTGGCT-3', and reverse: 5'-  
361 CTATGCCAGAATAACCCTGCAATGC-3' (expected amplicon size: 142 bp) for the *amhr2a* gene.

362

### 363 **DNA extraction for PCR sex genotyping**

364 DNA from fin clips was extracted using a Chelex-based extraction method. Briefly, a piece of fin clip  
365 from each sample was placed into a PCR tube, and then 150 µl 5% Chelex and 20 µl 1 mg/ml  
366 proteinase K were added to each tube. Tubes were then vortexed and quickly spun down. After that,  
367 samples were incubated for 2 h at 56°C followed by boiling 10 min at 99°C. DNA was then centrifuged  
368 at 7500 g for 5 min and diluted to 1:2 with double distilled water. Genotyping PCR reactions were  
369 run in 12.5 µl with 1.25 µl JumpStart PCR buffer 10X, 0.125 µl 25 mM dNTP, 0.25 µl 10 µM forward  
370 and reverse primers, 8.5 µl ddH<sub>2</sub>O and 2 µl DNA. PCR cycling conditions were: 95°C for 3 min as  
371 initial denaturation, then 35 cycles for amplification with denaturation at 95°C for 30 s, annealing at  
372 52°C for 30 s and extension at 72°C for 30 s, and finally another more extension at 72°C for 30 s and  
373 hold at 4°C.

374

## 375 RESULTS

376

### 377 A high-quality chromosome-scale genome assembly of *P. hypophthalmus*

378 A high-quality reference genome of a male *P. hypophthalmus* was sequenced using a combination of  
379 10X Linked-Reads, Oxford Nanopore long reads and a chromosome contact map (Hi-C). Its genome  
380 size based on the kmer linked-reads distribution was estimated around 810 Mb including, respectively  
381 65% and 35 % of unique and repeated sequences. The heterozygosity level of this *P. hypophthalmus*  
382 genome was estimated at around 1.2 %. The integration of all sequencing data provided a genome  
383 assembly size of 760 Mb (93% of the kmer estimated size), containing 612 contigs, a scaffold N50  
384 of 26.4 Mb (Table 1) and 99.2% of all sequences anchored onto 30 chromosomes after Hi-C  
385 integration (see assembly metrics and comparison with other genome assemblies in Table 1).  
386 Combining *de novo* gene predictions, homology to teleost proteins, and evidence from transcripts,  
387 25,076 protein-coding genes were annotated in our male *P. hypophthalmus* reference genome using  
388 our in-house genome annotation protocol. Because our *P. hypophthalmus* genome assembly has been  
389 derived by NCBI to produce a Reference Sequence (RefSeq) record (GCF\_009078355.1) and was  
390 annotated by the NCBI Eukaryotic Genome Annotation Pipeline, the NCBI annotation will be used  
391 thereafter as reference in the following text. In addition to protein-coding genes, 323 microRNA  
392 genes (miRNAs) and 389 mature miRNAs were annotated using Illumina small-RNA sequencing  
393 data from a panel of eight organs. Gene and mature miRNA annotations as well as analyzed  
394 expression patterns are publicly available on FishmiRNA (<http://www.fishmirna.org/>) (Thomas  
395 Desvignes et al., 2022). This genome-wide miRNA annotation represents the first exhaustive miRNA  
396 annotation available for a Pangasiid species.

397

### 398 Characterization of a male-specific *amhr2* duplication in *P. hypophthalmus*

399 Because many teleost MSD genes evolved from the duplication of an autosomal “usual suspect” gene,  
400 we first searched for potential duplicates of *dmrt1*, *amh*, *amhr2*, *sox3*, *gsdf* and *gdf6* genes in the *P.*  
401 *hypophthalmus* genome assemblies. We found no gene duplication for *dmrt1*, *amh*, *sox3*, *gsdf* and  
402 *gdf6* (*gdf6a* and *gdf6b*), but two *amhr2* homologs were found in the two male *P. hypophthalmus*  
403 assemblies (GENO\_Phyp\_1.0 and VN\_pangasius) while only one *amhr2* gene was detected in the  
404 female *P. hypophthalmus* ASM1680104v1 assembly. In the GENO\_Phyp\_1.0 *P. hypophthalmus*  
405 assembly, these two *amhr2* homologs, i.e., LOC113540131 (annotated as bone morphogenetic  
406 protein receptor type-2-like) and LOC113533735 (annotated as anti-Mullerian hormone type-2  
407 receptor-like) are located respectively on chromosome 4 (Chr04:32,081,919-32,105,291) and 10

408 (Chr10: 26,334,822-26,348,340). The single *amhr2* locus found in the female ASM1680104v1  
409 assembly (in ASM1680104v1 Chr04), is on chromosome 4 and shares 99% identity over 13.5 kb  
410 (100% overlap) with LOC113533735, and 87% identity on only 3% overlapping regions with  
411 LOC113540131. Using primers (see Materials and Methods) designed to amplify specifically either  
412 LOC113540131 or LOC113533735, we genotyped *P. hypophthalmus* males (N=12) and females  
413 (N=11) and found that LOC113540131 is significantly linked with maleness ( $p = 7.12e^{-05}$ ) with a  
414 single positive outlier among 11 phenotypic females (see Table 2). In contrast, LOC113533735 was  
415 detected in all males and females (Fig. 1). These genotyping results, along with the absence of  
416 LOC113540131 in the female ASM1680104v1 assembly, strongly support the hypothesis that  
417 LOC113540131 is a Y-specific male-specific, gene. We thus called the LOC113540131 gene,  
418 *amhr2by*, as the male-specific Y chromosome paralog of the autosomal LOC113533735 gene named  
419 *amhr2a*.

420

#### 421 **Comparison of *P. hypophthalmus amhr2by* and *amhr2a* and their inferred proteins**

422 Overall, the predicted structure of the autosomal *P. hypophthalmus amhr2a* and the canonical  
423 vertebrate *Amhr2* are similar with the same number of introns and exons. The mVISTA (Frazer,  
424 Pachter, Poliakov, Rubin, & Dubchak, 2004) alignments of *P. hypophthalmus amhr2a* and *amhr2by*  
425 genes along with their CDS (Fig. 2A), show that these two genes display some sequence identity only  
426 within their shared exons, with no significant homology detected in their intronic, 3'UTR, and 5'UTR  
427 sequences (Fig. 2A). In addition, the *amhr2by* gene is lacking the first two exons of *amhr2a*, and the  
428 third *amhr2by* exon is also truncated. The *amhr2by* and *amhr2a* CDS share 78.78% identity on 1,164  
429 bp of overlapping sequences (78% of the *amhr2a* CDS that is 1,455 bp long). Correspondingly, the  
430 two deduced proteins share 70.32% identity over 380 overlapping amino-acids, and Amhr2by lacks  
431 112 amino-acids at its N-terminal extremity corresponding to two first exons and part of exon 3 of  
432 Amhr2a. (Fig. 2B and 2C). Hence, the *P. hypophthalmus* Amhr2by translates as an N-terminal-  
433 truncated type II receptor lacking its whole extra-cellular domain mediating ligand binding, while  
434 overall the remaining of the other functional domains (transmembrane and serine-threonine kinase  
435 domain) remain similar between Amhr2a and Amhr2by (Fig. 2B and 2C).

436

#### 437 **Expression of *amhr2by* and *amhr2a* in *P. hypophthalmus* adult tissues**

438 Using *P. hypophthalmus* RNA-Seq from the PhyloFish database (Pasquier et al., 2016), we examined  
439 the organ expression of *amhr2a* and *amhr2by* along with a series of SD genes previously identified  
440 in other teleosts, i.e., *amh*, *dmrt1*, *gsdf*, *gdf6a*, *gdf6b* and *sox3*. Among these genes, *amh*, *dmrt1*, and  
441 *gsdf* display predominant expression in the adult testis and / or ovary with a much lower expression

442 in the eight additional somatic organs examined or in embryos (Fig. 3A). The two *amhr2* genes also  
443 have a gonadal-predominant expression pattern with *amhr2a* being expressed in both ovary and testis  
444 while *amhr2by* being strictly expressed in the testis as expected for a Y chromosome sex  
445 determination gene (Fig. 3B). The two *gdf6* paralogs (*gdf6a*, *gdf6b*) and *sox3* have no expression or  
446 a low expression in gonads and are more expressed in embryos for *sox3* and *gdf6a* or in bones and  
447 brain for *sox3*.

448

#### 449 **Sex-linkage of *amhr2by* in Pangasiids**

450 To explore the evolution of *amhr2by* in Pangasiids, we obtained gDNA samples from 11 additional  
451 Pangasiid species with at least some specimens being phenotypically sexed for four of these species  
452 (Table S2). Samples from fish that were phenotypically sexed (i.e., *Pangasianodon gigas*, *Pangasius*  
453 *djambal*, *Pangasius conchophilus*, and *Pangasius bocourti*) were PCR genotyped to explore the  
454 potential conservation of *amhr2by* male sex-linkage in Pangasiids. In three of these species, *amhr2by*  
455 was found to be significantly associated with male phenotype ( $p < 8.528e^{-04}$ ) (Table 2), except in *P.*  
456 *gigas*, the association was not significant ( $p = 0.3865$ ) due to the combination of low sample size (3  
457 males and 3 females) and the presence of one female outlier (Table 2). To complement this  
458 genotyping information, one male individual of *P. gigas*, *P. djambal*, *P. conchophilus*, and *P.*  
459 *bocourti* and one individual of unknown sex for *P. elongatus*, *P. siamensis*, *P. sanitwongsei*, *P.*  
460 *macronema*, *P. larnaudii*, *P. mekongensis* and *P. krempfi* were sequenced using Illumina short-read  
461 strategies. These genomic short-read sequences were assembled and anchored using a reference-  
462 guided strategy (Lischer & Shimizu, 2017) on the *P. hypophthalmus* chromosome assembly, and the  
463 NCBI gene annotation of GENO\_Phyp\_1.0 was lifted over to these assemblies (see genome and  
464 annotation metrics in Table S1). The *amhr2a* genes were extracted from all these guided assemblies,  
465 and *amhr2by* homologs were extracted from the four male assemblies, i.e., *P. gigas*, *P. djambal*, *P.*  
466 *conchophilus*, and *P. bocourti* as well as from the unknown sex assemblies of *P. sanitwongsei*, and  
467 *P. krempfi*. To better explore sex-linkage in species for which we only sequenced a single individual,  
468 read coverage was explored around the *amhr2a* and *amhr2by* loci using the *P. hypophthalmus* as  
469 reference genome (Fig. S1). Under the hypothesis that *amhr2by* is also a male-specific Y  
470 chromosomal gene in additional Pangasiids, we expected a half coverage around *amhr2by* in males  
471 (hemizygous in XY) and an average read coverage around the autosomal *amhr2a*. In agreement with  
472 that hypothesis, a half coverage was found around the *amhr2by* locus for all species in which *amhr2by*  
473 was identified i.e., the male individuals of *P. hypophthalmus*, *P. gigas*, *P. djambal*, *P. conchophilus*,  
474 and *P. bocourti* and individuals of unknown sex in *P. sanitwongsei*, and *P. krempfi*. This result  
475 supports hemizyosity of *amhr2by* in these species as expected for a Y chromosomal gene. In other

476 species, i.e., *P. elongatus*, *P. siamensis*, *P. macronema*, *P. larnaudii*, and *P. mekongensis*, no  
477 conclusion can be drawn because the absence of finding *amhr2by* in these individuals could be  
478 because they are XX females without a Y chromosome and an *amhr2by* gene, or these species may  
479 have lost *amhr2by* as a Y chromosome gene.

480

#### 481 **Evolution of *amhr2* in Siluriformes**

482 These whole-genome annotations were combined with protein sequences from channel catfish,  
483 *Ictalurus punctatus* (Siluriformes, Ictaluridae) used as a Pangasiid outgroup, and 8151 groups of one-  
484 to-one orthologs were used after concatenation to construct a whole-genome species tree inference  
485 (Fig. 4). In addition, all Pangasiids *amhr2* sequences deduced from our genomic resources were used  
486 for phylogenetic analyses with other available catfish *amhr2* genes (Table S2), along with *amhr2*  
487 from a gymnotiform (*Electrophorus electricus*) and a characiform (*Astyanax mexicanus*) as the  
488 closest species outgroups to the Siluriformes order. The topologies of all trees, i.e., using maximum-  
489 likelihood and Bayesian methods on proteins, CDS, and CDS with third codons removed (see  
490 Materials and Methods), were all congruent in showing that most of the *amhr2* from the sub-order  
491 Siluroidei (Sullivan et al., 2006) cluster with the Pangasiid *amhr2a*, and that outside the Pangasiid  
492 family, only a single species (*Pimelodus maculatus*, Pimelodidae) has an *amhr2* duplication  
493 clustering with the *amhr2by* sequences (Fig. 5, Fig. S2). Within the Siluriformes, a single *amhr2* in  
494 *Corydoras sp* (Callichthyidae, Loricarioidei) roots the *amhr2a* and *amhr2b* duplications (Fig. 5, Fig.  
495 S2), suggesting that *amhr2b* (*P. maculatus*) and *amhr2by* (Pangasiids) arose from an ancient  
496 duplication / insertion event at the root of the Siluroidei radiation that is dated around 100 million  
497 years ago (Kappas et al., 2016). We also searched for selection acting on the Pangasiid *amhr2*  
498 sequences, but detected no statistically significant signal of positive selection (Table 3) for either all  
499 exons conserved in both *amhr2a* and *amhr2by* (“conserved exons”) or for the exon region found only  
500 in *amhr2a* (“first exons”).

501

#### 502 **DISCUSSION**

503

504 The Pangasiid family contains both important aquaculture species (Lazard et al., 2009) and key  
505 ecological catfish species (Eva et al., 2016) in many south Asian countries. Here, we present a  
506 reference genome for striped catfish, *Pangasianodon hypophthalmus*, and provide an additional high-  
507 quality genomic resource combining long-read sequencing and a chromosomal assembly for this  
508 species. This *de novo* genome (GENO\_Phyp\_1.0, GCA\_009078355.1) was assembled into 30 large  
509 scaffolds that most likely correspond to the 30 chromosomes reported previously in cytological



510 studies (Sreeputhorn et al., 2017). This assembly also improves the metrics of the previously publicly  
511 available male assembly VN\_pangasius (GCA\_003671635.1) that was not anchored on chromosomes  
512 (O. T. P. Kim et al., 2018), and is comparable in terms of assembly metrics to the newest female  
513 ASM1680104v1 (GCA\_016801045.1) chromosome-anchored assembly (Z. Gao et al., 2021). In  
514 addition to this *P. hypophthalmus* chromosome-anchored assembly, we also provided short-read  
515 genome sequencing for eleven additional Pangasiid species belonging to the genera *Pangasianodon*  
516 (1 additional species) and *Pangasius* (10 additional species). These short-read assemblies have been  
517 anchored and annotated on our reference *P. hypophthalmus* genome assembly and now present a large  
518 public set of genomic resources for the Pangasiid family.

519

520 Phylogenetic relationships within Siluriformes are still debated with no consensus for clear placement  
521 of some families within this order (Kappas et al., 2016; Sullivan et al., 2006). But at a broader scale,  
522 it is generally accepted that the sub-order Loricarioidei (defined also as a super-family) containing  
523 the armored catfish families (Callichthyids and Loricariids) is the earliest-diverging Siluriformes  
524 clade with the Diplomystoidei sub-order being the sister group to the remaining Siluroidei sub-order  
525 (Kappas et al., 2016; Sullivan et al., 2006). Pangasiids belong to the Siluroidei sub-order and have  
526 been characterized as the sister group to either Ictaluridae and Cranoglanididae (Kappas et al., 2016)  
527 or Schilbidae (Villela et al., 2017). Their phylogeny has been explored using both mitochondrial and  
528 nuclear makers (Karinthanyakit & Jondeung, 2012; Pouyaud et al., 2016). Here, using a  
529 phylogenomic approach (Delsuc, Brinkmann, & Philippe, 2005), we were able to determine the  
530 precise phylogenetic relationships among the 12 Pangasiid species for which we produced genome  
531 sequencing. Our results confirmed the basal position of the *Pangasianodon* genus as already  
532 described (Karinthanyakit & Jondeung, 2012; Na-Nakorn et al., 2006; Pouyaud et al., 2016) and,  
533 although we did not sequence any *Helicophagus* or *Pseudolais* genera, results allowed us to resolve  
534 the taxonomic positions of several *Pangasius* species (Karinthanyakit & Jondeung, 2012).

535

536 The molecular basis of genetic sex determination has been explored in only a few catfishes, with  
537 reports on the identification of male sex-specific sequences supporting a XX/XY sex determination  
538 system in *Pseudobagrus ussuriensis* (Z.-J. Pan, Li, Zhou, Qiang, & Gui, 2015) and *Pelteobagrus*  
539 (*Tachysurus*) *fulvidraco* (Dan, Mei, Wang, & Gui, 2013; Wang, Mao, Chen, Liu, & Gui, 2009) from  
540 the Bagridae family, and in *Clarias gariepinus* from the Clariidae family (Kovács, Egedi, Bártfai, &  
541 Orbán, 2000). In the Ictalurid channel catfish, *Ictalurus punctatus*, based on whole genome  
542 sequencing of a YY individual and genome-wide analyses, an isoform of the breast cancer anti-  
543 resistance 1 (*bcar1*) gene has been characterized as the male master sex determining gene (Bao et al.,

544 2019). In Pangasiids, genetic sex-markers have been searched without success in *P. hypophthalmus*  
545 and *P. gigas* (Sriphairoj et al., 2007). In our study, based on chromosome-scale genome assemblies  
546 of many Pangasiid species, transcriptomic data (Pasquier et al., 2016), and sex-linkage analyses we  
547 identified a male-specific duplication of the *amhr2* (*amhr2by*) gene as a potentially conserved male  
548 master sex determining gene in that fish family. The role of *Amhr2* as a master sex determining gene  
549 has been functionally characterized in the tiger pufferfish, *Takifugu rubripes* and Ayu, *Plecoglossus*  
550 *altivelis* (Kamiya et al., 2012; Nakamoto et al., 2021) and strongly suggested by sex-linkage  
551 information in common seadragon, *Phyllopteryx taeniolatus*, alligator pipefish, *Syngnathoides*  
552 *biaculeatus* (Qu et al., 2021), other species of pufferfishes (Duan et al., 2021; F.-X. Gao et al., 2020;  
553 Kamiya et al., 2012) and yellow perch, *Perca flavescens* (Feron et al., 2020). In addition, the anti-  
554 Mullerian hormone, Amh, which is the cognate ligand of AmhR2, has also been demonstrated or  
555 suggested as a master sex determining gene in a few fish species (Hattori et al., 2012; M. Li et al.,  
556 2015; Q. Pan et al., 2019, 2021; Song et al., 2021). Our results thus provide a new example of the  
557 repeated and independent recruitment of Amh and TGF $\beta$  pathway members in fish genetic sex  
558 determination (Q. Pan et al., 2021). Although formal proof that this *amhr2by* gene is a conserved  
559 master sex determining gene in Pangasiids will require additional gene expression analyses and  
560 functional demonstrations, our results have application as a useful marker for sex control in many  
561 Pangasiid species in aquaculture. Sex dimorphic growth is often one of the main reasons for breeding  
562 all-male or all-female populations for aquaculture purposes. In Pangasiids, females have a faster  
563 growth rate in *P. djambal* above 3 kg, probably linked with the early maturation of males (Legendre  
564 et al., 2000). In contrast, weight gain was better in males compared to females in *P. bocourti* (Meng-  
565 Umphan, 2009). In addition, our results will also allow better management of breeders used for  
566 restocking in the large and endangered Mekong Giant Catfish, *P. gigas*, because maturation takes as  
567 long as 16-20 years in this species (Sriphairoj et al., 2007).

568  
569 Our results on Pangasiid sex determination also raise interesting questions on Amhr2 structure and  
570 evolution. For instance, the N-terminal truncation of all the Pangasiid Amhr2by proteins is intriguing  
571 because this N-terminal part of the TGF $\beta$  type II receptors encodes the complete extracellular ligand-  
572 binding domain that is known to be crucial for ligand binding specificity (Hart et al., 2021). N-  
573 terminal truncations of TGF $\beta$  receptors acting as sex-determining genes have been already reported  
574 for Amhr2 in yellow perch (Feron et al., 2020) and common seadragon (Qu et al., 2021), and for  
575 Bmpr1b in the Atlantic herring, *Clupea harengus* (Rafati et al., 2020). In the Atlantic herring, the N-  
576 terminal truncated Bmpr1bby protein lacks the canonical TGF $\beta$  receptor extracellular domains, but  
577 has maintained its ability to propagate a specific intracellular signal through kinase activity and Smad

578 protein phosphorylation (Rafati et al., 2020). Together, these studies suggest that some TGF $\beta$   
579 receptors truncated in their N-terminal extracellular ligand-binding domain can still trigger a  
580 biological response independent from any ligand activation. The fact that convergently, many fish  
581 master sex determining genes encoding a TGF $\beta$  receptor with a similar N-terminal truncation,  
582 suggests that such a ligand-independent action is probably an important step that could have been  
583 selected independently to allow an autonomous action of the master sex determining gene. A second  
584 interesting and unexpected result from our study is that the duplication of *amhr2* genes that gave birth  
585 to the Pangasiids *amhr2by* gene is potentially ancient and so is likely to still be present in additional  
586 catfish species outside the Pangasidae family. This result is well supported by the topologies of our  
587 *amhr2* phylogenetic gene trees that place the origin of this duplication at the root of the Siluroidei  
588 sub-order that is dated around 100 Mya (Kappas et al., 2016). We also found one example of an  
589 *amhr2b* that is retained in the *Pimelodus maculatus* (Pimelodidae family) genome, although we do  
590 not know if this gene is also sex-linked in this species. But surprisingly no other *amhr2* duplication  
591 has been reported yet in other catfish species. Gains and losses of master sex determining genes have  
592 been already described such as in Esociformes in which some species have completely lost the *amh*  
593 duplication (*amhby*) that is a master sex determining gene in other closely related species from the  
594 same family (Q. Pan et al., 2019, 2021). Such complete gene losses can also be expected in catfishes  
595 like for instance in the channel catfish that relies on the *bcar1* gene as master sex determining gene  
596 (Bao et al., 2019), with no remains of an *amhr2* gene duplication. This situation is also probably the  
597 case for additional catfish species in which we did not find any *amhr2* duplication in male genome  
598 assemblies like in the Ictaluridae, *Ameiurus melas*, the Clariidae, *Clarias magur*, and the  
599 Auchenipteridae, *Ageneiosus marmoratus*. But if *amhr2b* is also male-specific as in Pangasiids, the  
600 question remains open for the additional catfish species where only female genome assemblies are  
601 currently available, such as in the Sisoridae, Siluridae and Bagridae families. A more extensive search  
602 for a potential duplication of *amhr2* genes in additional Siluroidei catfishes would be needed to better  
603 understand the fate of the *amhr2b* gene and whether it remains a master sex determining gene like in  
604 the Pangasiid family.

605  
606 Together our results bring multiple lines of evidence supporting the hypothesis that the conserved  
607 Pangasiid *amhr2by* is a potential sex determining gene that stemmed from an ancient duplication  
608 common to all Siluroidei catfishes. Our results highlight the recurrent usage of the TGF $\beta$  pathway in  
609 teleost sex determination (Q. Pan et al., 2021) and the potential functional innovation through protein  
610 truncation. Furthermore, our results showcase the less considered long-term stability of sex  
611 determination gene in teleosts, a group that often receives attention for its dynamic evolution of sex

612 determination systems.

613

#### 614 **DATA AVAILABILITY**

615 The Whole Genome Shotgun project of *P. hypophthalmus*, is available in the Sequence Read Archive  
616 (SRA), under BioProject reference PRJNA547555 with 10X genomics and Hi-C Illumina sequencing  
617 data is available in SRA under accession number SRX6071341 and SRX6071345 and Oxford  
618 Nanopore long reads data under SRA accession numbers SRX6071342 to SRX6071344 and  
619 SRX6071346 to SRX6071355. *P. hypophthalmus* small RNA-Seq sequences are available in SRA  
620 under Bioproject PRJNA256963. *P. gigas* and *P. djambal* genomes assembled with a *P.*  
621 *hypophthalmus* reference-guided strategy have been submitted to SRA under the respective  
622 BioProjects PRJNA593917 and PRJNA605300. All other Pangasiidae genomes assembled with a *P.*  
623 *hypophthalmus* reference-guided strategy without their genome annotations are available in SRA  
624 under BioProject PRJNA795327, and their genome assemblies plus their annotations are available in  
625 the omics dataverse (Open source research data repository) server with the following DOI  
626 (<https://doi.org/10.15454/M3HYAX>). *Pangasius siamensis* has been considered by NCBI curators as  
627 a *P. macronema* synonym and its genome is then recorded in NCBI with *P. macronema* as a  
628 Biosample species name, with sample name PaSia (for *Pangasius siamensis*) under accession  
629 BioSample number SAMN24707637.

630

#### 631 **BENEFIT-SHARING STATEMENT**

632 A research collaboration was developed with scientists from the countries providing genetic samples  
633 (KS in Thailand, GR in Indonesia, TTTH in Vietnam, and JR and FLA in Brazil), all collaborators  
634 are included as co-authors, the results of research have been shared with the provider communities,  
635 and the research addresses a priority concern, in this case the conservation of organisms being studied.  
636 More broadly, our group is committed to international scientific partnerships, as well as institutional  
637 capacity building.

638

#### 639 **ACKNOWLEDGEMENTS**

640 This project was supported by funds from the “Agence Nationale de la Recherche” (PhyloSex project,  
641 grant No. ANR-13-ISV7-0005; GenoFish project, grant No. ANR-16-CE12-0035) and R35  
642 GM139635 and R01 OD011116 from the National Institutes of Health, USA. The GeT-PlaGe,  
643 Gentyane and Montpellier GenomiX (MGX) facilities were supported by France Génomique  
644 National infrastructure, funded as part of “Investissement d’avenir” program managed by Agence  
645 Nationale pour la Recherche (grant No. ANR-10-INBS-09). MRR was supported by the Swiss

646 National Science Foundation (grant 173048). We are grateful to the Genotoul bioinformatics platform  
647 Toulouse Midi-Pyrenees (Bioinfo Genotoul) for providing computing and/or storage resources.

648

## 649 REFERENCES

- 650 Anders, S., Pyl, P. T., & Huber, W. (2015). HTSeq—A Python framework to work with high-throughput  
651 sequencing data. *Bioinformatics (Oxford, England)*, 31(2), 166–169. doi:  
652 10.1093/bioinformatics/btu638
- 653 Anka, I. Z., Faruk, M., Hasan, M. M., & Azad, M. (2014). *Environmental Issues of Emerging Pangas (*  
654 *Pangasianodon hypophthalmus ) Farming in Bangladesh*. doi: 10.3329/PA.V24I1-2.19118
- 655 Bankevich, A., Nurk, S., Antipov, D., Gurevich, A. A., Dvorkin, M., Kulikov, A. S., ... Pevzner, P. A. (2012).  
656 SPAdes: A New Genome Assembly Algorithm and Its Applications to Single-Cell Sequencing.  
657 *Journal of Computational Biology*, 19(5), 455–477. doi: 10.1089/cmb.2012.0021
- 658 Bao, L., Tian, C., Liu, S., Zhang, Y., Elawad, A., Yuan, Z., ... Liu, Z. (2019). The Y chromosome sequence  
659 of the channel catfish suggests novel sex determination mechanisms in teleost fish. *BMC Biology*,  
660 17(1), 6. doi: 10.1186/s12915-019-0627-7
- 661 Baroiller, J. F., D’Cotta, H., & Saillant, E. (2009). Environmental effects on fish sex determination and  
662 differentiation. *Sexual Development: Genetics, Molecular Biology, Evolution, Endocrinology,*  
663 *Embryology, and Pathology of Sex Determination and Differentiation*, 3(2–3), 118–135. doi:  
664 10.1159/000223077
- 665 Benson, G. (1999). Tandem repeats finder: A program to analyze DNA sequences. *Nucleic Acids Research*,  
666 27(2), 573–580.
- 667 Bertho, S., Herpin, A., Scharl, M., & Guiguen, Y. (2021). Lessons from an unusual vertebrate sex-determining  
668 gene. *Philosophical Transactions of the Royal Society of London. Series B, Biological Sciences*,  
669 376(1832), 20200092. doi: 10.1098/rstb.2020.0092
- 670 Braasch, I., Gehrke, A. R., Smith, J. J., Kawasaki, K., Manousaki, T., Pasquier, J., ... Postlethwait, J. H. (2016).  
671 The spotted gar genome illuminates vertebrate evolution and facilitates human-teleost comparisons.  
672 *Nature Genetics*, 48(4), 427–437. doi: 10.1038/ng.3526
- 673 Cabanettes, F., & Klopp, C. (2018). D-GENIES: Dot plot large genomes in an interactive, efficient and simple  
674 way. *PeerJ*, 6, e4958. doi: 10.7717/peerj.4958
- 675 Chen, S., Zhang, G., Shao, C., Huang, Q., Liu, G., Zhang, P., ... Wang, J. (2014). Whole-genome sequence of  
676 a flatfish provides insights into ZW sex chromosome evolution and adaptation to a benthic lifestyle.  
677 *Nature Genetics*, 46(3), 253–260. doi: 10.1038/ng.2890
- 678 Dan, C., Mei, J., Wang, D., & Gui, J.-F. (2013). Genetic Differentiation and Efficient Sex-specific Marker  
679 Development of a Pair of Y- and X-linked Markers in Yellow Catfish. *International Journal of*  
680 *Biological Sciences*, 9(10), 1043–1049. doi: 10.7150/ijbs.7203
- 681 Davydov, I. I., Salamin, N., & Robinson-Rechavi, M. (2019). Large-Scale Comparative Analysis of Codon  
682 Models Accounting for Protein and Nucleotide Selection. *Molecular Biology and Evolution*, 36(6),  
683 1316–1332. doi: 10.1093/molbev/msz048
- 684 De Coster, W., D’Hert, S., Schultz, D. T., Cruts, M., & Van Broeckhoven, C. (2018). NanoPack: Visualizing  
685 and processing long-read sequencing data. *Bioinformatics*, 34(15), 2666–2669. doi:  
686 10.1093/bioinformatics/bty149
- 687 de Hoon, M. J. L., Imoto, S., Nolan, J., & Miyano, S. (2004). Open source clustering software. *Bioinformatics*  
688 *(Oxford, England)*, 20(9), 1453–1454. doi: 10.1093/bioinformatics/bth078
- 689 Delsuc, F., Brinkmann, H., & Philippe, H. (2005). Phylogenomics and the reconstruction of the tree of life.  
690 *Nature Reviews. Genetics*, 6(5), 361–375. doi: 10.1038/nrg1603
- 691 Desvignes, T., Batzel, P., Berezikov, E., Eilbeck, K., Eppig, J. T., McAndrews, M. S., ... Postlethwait, J. H.  
692 (2015). miRNA Nomenclature: A View Incorporating Genetic Origins, Biosynthetic Pathways, and  
693 Sequence Variants. *Trends in Genetics: TIG*, 31(11), 613–626. doi: 10.1016/j.tig.2015.09.002
- 694 Desvignes, Thomas, Bardou, P., Montfort, J., Sydes, J., Guyomar, C., George, S., ... Bobe, J. (2022).  
695 FishmiRNA: An evolutionarily supported microRNA annotation and expression database for ray-  
696 finned fishes. *Molecular Biology and Evolution*, msac004. doi: 10.1093/molbev/msac004
- 697 Desvignes, Thomas, Batzel, P., Sydes, J., Eames, B. F., & Postlethwait, J. H. (2019). miRNA analysis with

- 698 Prost! Reveals evolutionary conservation of organ-enriched expression and post-transcriptional  
699 modifications in three-spined stickleback and zebrafish. *Scientific Reports*, 9(1), 3913. doi:  
700 10.1038/s41598-019-40361-8
- 701 Desvignes, Thomas, Sydes, J., Montfort, J., Bobe, J., & Postlethwait, J. H. (2021). Evolution after Whole-  
702 Genome Duplication: Teleost MicroRNAs. *Molecular Biology and Evolution*, 38(8), 3308–3331. doi:  
703 10.1093/molbev/msab105
- 704 Devlin, R. H., & Nagahama, Y. (2002). Sex determination and sex differentiation in fish: An overview of  
705 genetic, physiological, and environmental influences. *Aquaculture*, 208(3), 191–364. doi:  
706 10.1016/S0044-8486(02)00057-1
- 707 Dobin, A., Davis, C. A., Schlesinger, F., Drenkow, J., Zaleski, C., Jha, S., ... Gingeras, T. R. (2013). STAR:  
708 Ultrafast universal RNA-seq aligner. *Bioinformatics (Oxford, England)*, 29(1), 15–21. doi:  
709 10.1093/bioinformatics/bts635
- 710 Duan, W., Gao, F.-X., Chen, Z., Gao, Y., Gui, J.-F., Zhao, Z., & Shi, Y. (2021). A sex-linked SNP mutation  
711 in *amhr2* is responsible for male differentiation in obscure puffer (Takifugu obscurus). *Molecular  
712 Biology Reports*, 48(8), 6035–6046. doi: 10.1007/s11033-021-06606-4
- 713 Dudchenko, O., Batra, S. S., Omer, A. D., Nyquist, S. K., Hoeger, M., Durand, N. C., ... Aiden, E. L. (2017).  
714 De novo assembly of the *Aedes aegypti* genome using Hi-C yields chromosome-length scaffolds.  
715 *Science (New York, N.Y.)*, 356(6333), 92–95. doi: 10.1126/science.aal3327
- 716 Durand, N. C., Robinson, J. T., Shamim, M. S., Machol, I., Mesirov, J. P., Lander, E. S., & Aiden, E. L. (2016).  
717 Juicebox Provides a Visualization System for Hi-C Contact Maps with Unlimited Zoom. *Cell Systems*,  
718 3(1), 99–101. doi: 10.1016/j.cels.2015.07.012
- 719 Durand, N. C., Shamim, M. S., Machol, I., Rao, S. S. P., Huntley, M. H., Lander, E. S., & Aiden, E. L. (2016).  
720 Juicer Provides a One-Click System for Analyzing Loop-Resolution Hi-C Experiments. *Cell Systems*,  
721 3(1), 95–98. doi: 10.1016/j.cels.2016.07.002
- 722 Eilbeck, K., Moore, B., Holt, C., & Yandell, M. (2009). Quantitative measures for the management and  
723 comparison of annotated genomes. *BMC Bioinformatics*, 10, 67. doi: 10.1186/1471-2105-10-67
- 724 Emms, D. M., & Kelly, S. (2019). OrthoFinder: Phylogenetic orthology inference for comparative genomics.  
725 *Genome Biology*, 20(1), 238. doi: 10.1186/s13059-019-1832-y
- 726 Eva, B., Harmony, P., Thomas, G., Francois, G., Alice, V., Claude, M., & Tony, D. (2016). Trails of river  
727 monsters: Detecting critically endangered Mekong giant catfish *Pangasianodon gigas* using  
728 environmental DNA. *Global Ecology and Conservation*, 7, 148–156. doi:  
729 10.1016/j.gecco.2016.06.007
- 730 Feron, R., Zahm, M., Cabau, C., Klopp, C., Roques, C., Bouchez, O., ... Guiguen, Y. (2020). Characterization  
731 of a Y-specific duplication/insertion of the anti-Mullerian hormone type II receptor gene based on a  
732 chromosome-scale genome assembly of yellow perch, *Perca flavescens*. *Molecular Ecology  
733 Resources*, 20(2), 531–543. doi: 10.1111/1755-0998.13133
- 734 Foissac, S., Djebali, S., Munyard, K., Vialaneix, N., Rau, A., Muret, K., ... Giuffra, E. (2019). Multi-species  
735 annotation of transcriptome and chromatin structure in domesticated animals. *BMC Biology*, 17(1),  
736 108. doi: 10.1186/s12915-019-0726-5
- 737 Frazer, K. A., Pachter, L., Poliakov, A., Rubin, E. M., & Dubchak, I. (2004). VISTA: Computational tools for  
738 comparative genomics. *Nucleic Acids Research*, 32(Web Server issue), W273-279. doi:  
739 10.1093/nar/gkh458
- 740 Gao, F.-X., Shi, Y., Duan, W., Lu, W.-J., Huang, W., Zhang, X.-J., ... Gui, J.-F. (2020). A rapid and reliable  
741 method for identifying genetic sex in obscure pufferfish (Takifugu obscurus). *Aquaculture*, 519,  
742 734749. doi: 10.1016/j.aquaculture.2019.734749
- 743 Gao, Z., You, X., Zhang, X., Chen, J., Xu, T., Huang, Y., ... Shi, Q. (2021). A chromosome-level genome  
744 assembly of the striped catfish (*Pangasianodon hypophthalmus*). *Genomics*, 113(5), 3349–3356. doi:  
745 10.1016/j.ygeno.2021.07.026
- 746 Guan, D., McCarthy, S. A., Wood, J., Howe, K., Wang, Y., & Durbin, R. (2020). Identifying and removing  
747 haplotypic duplication in primary genome assemblies. *Bioinformatics*, 36(9), 2896–2898. doi:  
748 10.1093/bioinformatics/btaa025
- 749 Hart, K. N., Stocker, W. A., Nagykerly, N. G., Walton, K. L., Harrison, C. A., Donahoe, P. K., ... Thompson,  
750 T. B. (2021). Structure of AMH bound to AMHR2 provides insight into a unique signaling pair in the  
751 TGF- $\beta$  family. *Proceedings of the National Academy of Sciences of the United States of America*,  
752 118(26), e2104809118. doi: 10.1073/pnas.2104809118

- 753 Hattori, R. S., Murai, Y., Oura, M., Masuda, S., Majhi, S. K., Sakamoto, T., ... Strüssmann, C. A. (2012). A  
754 Y-linked anti-Müllerian hormone duplication takes over a critical role in sex determination.  
755 *Proceedings of the National Academy of Sciences of the United States of America*, *109*(8), 2955–2959.  
756 doi: 10.1073/pnas.1018392109
- 757 Herpin, A., & Schartl, M. (2015). Plasticity of gene-regulatory networks controlling sex determination: Of  
758 masters, slaves, usual suspects, newcomers, and usurpators. *EMBO Reports*, *16*(10), 1260–1274. doi:  
759 10.15252/embr.201540667
- 760 Hoff, K. J., Lange, S., Lomsadze, A., Borodovsky, M., & Stanke, M. (2016). BRAKER1: Unsupervised RNA-  
761 Seq-Based Genome Annotation with GeneMark-ET and AUGUSTUS. *Bioinformatics (Oxford, England)*, *32*(5), 767–769. doi: 10.1093/bioinformatics/btv661
- 762 Holt, C., & Yandell, M. (2011). MAKER2: An annotation pipeline and genome-database management tool for  
763 second-generation genome projects. *BMC Bioinformatics*, *12*(1), 491. doi: 10.1186/1471-2105-12-491
- 764 Howe, K. L., Achuthan, P., Allen, J., Allen, J., Alvarez-Jarreta, J., Amode, M. R., ... Flicek, P. (2021). Ensembl  
765 2021. *Nucleic Acids Research*, *49*(D1), D884–D891. doi: 10.1093/nar/gkaa942
- 766 Imarazene, B., Du, K., Beille, S., Jouanno, E., Feron, R., Pan, Q., ... Guiguen, Y. (2021). A Supernumerary  
767 “B-Sex” Chromosome Drives Male Sex Determination in the Pachón Cavefish, *Astyanax mexicanus*  
768 (SSRN Scholarly Paper No. ID 3875774). Rochester, NY: Social Science Research Network. doi:  
769 10.2139/ssrn.3875774
- 770 Kallman, K. D. (1973). The Sex-Determining Mechanism of the Platyfish, *Xiphophorus maculatus*. In J. H.  
771 Schröder (Ed.), *Genetics and Mutagenesis of Fish* (pp. 19–28). Berlin, Heidelberg: Springer. doi:  
772 10.1007/978-3-642-65700-9\_2
- 773 Kamiya, T., Kai, W., Tasumi, S., Oka, A., Matsunaga, T., Mizuno, N., ... Kikuchi, K. (2012). A trans-species  
774 missense SNP in *Amhr2* is associated with sex determination in the tiger pufferfish, *Takifugu rubripes*  
775 (*fugu*). *PLoS Genetics*, *8*(7), e1002798. doi: 10.1371/journal.pgen.1002798
- 776 Kappas, I., Vittas, S., Pantzartzis, C. N., Drosopoulou, E., & Scouras, Z. G. (2016). A Time-Calibrated  
777 Mitogenome Phylogeny of Catfish (Teleostei: Siluriformes). *PLOS ONE*, *11*(12), e0166988. doi:  
778 10.1371/journal.pone.0166988
- 779 Karinthanyakit, W., & Jondeung, A. (2012). Molecular phylogenetic relationships of pangasiid and schilbid  
780 catfishes in Thailand. *Journal of Fish Biology*, *80*(7), 2549–2570. doi: 10.1111/j.1095-  
781 8649.2012.03303.x
- 782 Katoh, K., & Standley, D. M. (2013). MAFFT multiple sequence alignment software version 7: Improvements  
783 in performance and usability. *Molecular Biology and Evolution*, *30*(4), 772–780. doi:  
784 10.1093/molbev/mst010
- 785 Kelley, J. L., Desvignes, T., McGowan, K. L., Perez, M., Rodriguez, L. A., Brown, A. P., ... Tobler, M. (2021).  
786 MicroRNA expression variation as a potential molecular mechanism contributing to adaptation to  
787 hydrogen sulphide. *Journal of Evolutionary Biology*, *34*(6), 977–988. doi: 10.1111/jeb.13727
- 788 Kim, B.-M., Amores, A., Kang, S., Ahn, D.-H., Kim, J.-H., Kim, I.-C., ... Park, H. (2019). Antarctic blackfin  
789 icefish genome reveals adaptations to extreme environments. *Nature Ecology & Evolution*, *3*(3), 469–  
790 478. doi: 10.1038/s41559-019-0812-7
- 791 Kim, O. T. P., Nguyen, P. T., Shoguchi, E., Hisata, K., Vo, T. T. B., Inoue, J., ... Satoh, N. (2018). A draft  
792 genome of the striped catfish, *Pangasianodon hypophthalmus*, for comparative analysis of genes  
793 relevant to development and a resource for aquaculture improvement. *BMC Genomics*, *19*(1), 733.  
794 doi: 10.1186/s12864-018-5079-x
- 795 Kobayashi, Y., Nagahama, Y., & Nakamura, M. (2013). Diversity and plasticity of sex determination and  
796 differentiation in fishes. *Sexual Development: Genetics, Molecular Biology, Evolution, Endocrinology, Embryology, and Pathology of Sex Determination and Differentiation*, *7*(1–3), 115–  
797 125. doi: 10.1159/000342009
- 798 Kofler, R., Pandey, R. V., & Schlötterer, C. (2011). PoPoolation2: Identifying differentiation between  
799 populations using sequencing of pooled DNA samples (Pool-Seq). *Bioinformatics (Oxford, England)*,  
800 *27*(24), 3435–3436. doi: 10.1093/bioinformatics/btr589
- 801 Kolmogorov, M., Yuan, J., Lin, Y., & Pevzner, P. A. (2019). Assembly of long, error-prone reads using repeat  
802 graphs. *Nature Biotechnology*, *37*(5), 540–546. doi: 10.1038/s41587-019-0072-8
- 803 Koren, S., Walenz, B. P., Berlin, K., Miller, J. R., Bergman, N. H., & Phillippy, A. M. (2017). Canu: Scalable  
804 and accurate long-read assembly via adaptive k-mer weighting and repeat separation. *Genome*  
805 *Research*, *27*(5), 722–736. doi: 10.1101/gr.215087.116
- 806  
807

- 808 Kovács, B., Egedi, S., Bártfai, R., & Orbán, L. (2000). Male-specific DNA markers from African catfish  
809 (Clarias gariepinus). *Genetica*, *110*(3), 267–276. doi: 10.1023/A:1012739318941
- 810 Koyama, T., Nakamoto, M., Morishima, K., Yamashita, R., Yamashita, T., Sasaki, K., ... Sakamoto, T. (2019).  
811 A SNP in a Steroidogenic Enzyme Is Associated with Phenotypic Sex in *Seriola* Fishes. *Current*  
812 *Biology*, *29*(11), 1901–1909.e8. doi: 10.1016/j.cub.2019.04.069
- 813 Lartillot, N., Lepage, T., & Blanquart, S. (2009). PhyloBayes 3: A Bayesian software package for phylogenetic  
814 reconstruction and molecular dating. *Bioinformatics*, *25*(17), 2286–2288. doi:  
815 10.1093/bioinformatics/btp368
- 816 Lazard, J., Cacot, P., Slembrouck, J., & Legendre, M. (2009). La pisciculture des Pangasiidae. *Cahiers*  
817 *Agricultures*, *18*(2–3), 164–173 (1). doi: 10.1684/agr.2009.0284
- 818 Legendre, M., Pouyaud, L., Slembrouck, J., Gustiano, R., Kristanto, A. H., Subagja, J., ... Maskeer. (2000).  
819 *Pangasius djambal*: A new candidate species for fish culture in Indonesia. (Horizon (IRD)).
- 820 Lemey, P. (2009). *The Phylogenetic Handbook: A Practical Approach to Phylogenetic Analysis and*  
821 *Hypothesis Testing* (\$ {number}nd édition). Cambridge, UK ; New York: Cambridge University Press.
- 822 Li, H. (2013). *Aligning sequence reads, clone sequences and assembly contigs with BWA-MEM*. Retrieved  
823 from <https://arxiv.org/abs/1303.3997v2>
- 824 Li, H. (2018). Minimap2: Pairwise alignment for nucleotide sequences. *Bioinformatics (Oxford, England)*,  
825 *34*(18), 3094–3100. doi: 10.1093/bioinformatics/bty191
- 826 Li, H., Handsaker, B., Wysoker, A., Fennell, T., Ruan, J., Homer, N., ... 1000 Genome Project Data Processing  
827 Subgroup. (2009). The Sequence Alignment/Map format and SAMtools. *Bioinformatics (Oxford,*  
828 *England)*, *25*(16), 2078–2079. doi: 10.1093/bioinformatics/btp352
- 829 Li, M., Sun, Y., Zhao, J., Shi, H., Zeng, S., Ye, K., ... Wang, D. (2015). A Tandem Duplicate of Anti-Müllerian  
830 Hormone with a Missense SNP on the Y Chromosome Is Essential for Male Sex Determination in Nile  
831 Tilapia, *Oreochromis niloticus*. *PLOS Genetics*, *11*(11), e1005678. doi:  
832 10.1371/journal.pgen.1005678
- 833 Lischer, H. E. L., & Shimizu, K. K. (2017). Reference-guided de novo assembly approach improves genome  
834 reconstruction for related species. *BMC Bioinformatics*, *18*(1), 474. doi: 10.1186/s12859-017-1911-6
- 835 Love, M. I., Huber, W., & Anders, S. (2014). Moderated estimation of fold change and dispersion for RNA-  
836 seq data with DESeq2. *Genome Biology*, *15*(12), 550. doi: 10.1186/s13059-014-0550-8
- 837 Mank, J. E., & Avise, J. C. (2009). Evolutionary diversity and turn-over of sex determination in teleost fishes.  
838 *Sexual Development: Genetics, Molecular Biology, Evolution, Endocrinology, Embryology, and*  
839 *Pathology of Sex Determination and Differentiation*, *3*(2–3), 60–67. doi: 10.1159/000223071
- 840 Marçais, G., & Kingsford, C. (2011). A fast, lock-free approach for efficient parallel counting of occurrences  
841 of k-mers. *Bioinformatics (Oxford, England)*, *27*(6), 764–770. doi: 10.1093/bioinformatics/btr011
- 842 Martin, M. (2011). Cutadapt removes adapter sequences from high-throughput sequencing reads.  
843 *EMBnet.Journal*, *17*(1), 10–12. doi: 10.14806/ej.17.1.200
- 844 Matsuda, M., Nagahama, Y., Shinomiya, A., Sato, T., Matsuda, C., Kobayashi, T., ... Sakaizumi, M. (2002).  
845 DMY is a Y-specific DM-domain gene required for male development in the medaka fish. *Nature*,  
846 *417*(6888), 559–563. doi: 10.1038/nature751
- 847 Meng-Umphang, K. (2009). Growth Performance, Sex Hormone Levels and Maturation Ability of Pla Pho  
848 (*Pangasius bocourti*) Fed with Spirulina Supplementary Pellet and Hormone Application. *Int. J. Agric.*  
849 *Biol.*, *11*(4), 5.
- 850 Minh, B. Q., Schmidt, H. A., Chernomor, O., Schrempf, D., Woodhams, M. D., von Haeseler, A., & Lanfear,  
851 R. (2020). IQ-TREE 2: New Models and Efficient Methods for Phylogenetic Inference in the Genomic  
852 Era. *Molecular Biology and Evolution*, *37*(5), 1530–1534. doi: 10.1093/molbev/msaa015
- 853 Moore, E. C., & Roberts, R. B. (2013). Polygenic sex determination. *Current Biology: CB*, *23*(12), R510–512.  
854 doi: 10.1016/j.cub.2013.04.004
- 855 Morgulis, A., Gertz, E. M., Schäffer, A. A., & Agarwala, R. (2006). A fast and symmetric DUST  
856 implementation to mask low-complexity DNA sequences. *Journal of Computational Biology: A*  
857 *Journal of Computational Molecular Cell Biology*, *13*(5), 1028–1040. doi: 10.1089/cmb.2006.13.1028
- 858 Myosho, T., Otake, H., Masuyama, H., Matsuda, M., Kuroki, Y., Fujiyama, A., ... Sakaizumi, M. (2012).  
859 Tracing the emergence of a novel sex-determining gene in medaka, *Oryzias luzonensis*. *Genetics*,  
860 *191*(1), 163–170. doi: 10.1534/genetics.111.137497
- 861 Nakamoto, M., Uchino, T., Koshimizu, E., Kuchiishi, Y., Sekiguchi, R., Wang, L., ... Sakamoto, T. (2021). A  
862 Y-linked anti-Müllerian hormone type-II receptor is the sex-determining gene in ayu, *Plecoglossus*



- 863 altivelis. *PLoS Genetics*, 17(8), e1009705. doi: 10.1371/journal.pgen.1009705
- 864 Na-Nakorn, U., & Moeikum, T. (2009). Genetic diversity of domesticated stocks of striped catfish,  
865 Pangasianodon hypophthalmus (Sauvage 1878), in Thailand: Relevance to broodstock management  
866 regimes. *Aquaculture*, 297(1/4), 70–77.
- 867 Na-Nakorn, U., Sukmanom, S., Nakajima, M., Taniguchi, N., Kamonrat, W., Poompuang, S., & Nguyen,  
868 T. T. T. (2006). MtDNA diversity of the critically endangered Mekong giant catfish (Pangasianodon  
869 gigas Chevey, 1913) and closely related species: Implications for conservation. *Animal Conservation*,  
870 9(4), 483–494. doi: 10.1111/j.1469-1795.2006.00064.x
- 871 Nanda, I., Kondo, M., Hornung, U., Asakawa, S., Winkler, C., Shimizu, A., ... Scharl, M. (2002). A duplicated  
872 copy of DMRT1 in the sex-determining region of the Y chromosome of the medaka, *Oryzias latipes*.  
873 *Proceedings of the National Academy of Sciences of the United States of America*, 99(18), 11778–  
874 11783. doi: 10.1073/pnas.182314699
- 875 Ospina-Alvarez, N., & Piferrer, F. (2008). Temperature-dependent sex determination in fish revisited:  
876 Prevalence, a single sex ratio response pattern, and possible effects of climate change. *PloS One*, 3(7),  
877 e2837. doi: 10.1371/journal.pone.0002837
- 878 Pan, Q., Anderson, J., Bertho, S., Herpin, A., Wilson, C., Postlethwait, J. H., ... Guiguen, Y. (2016). Vertebrate  
879 sex-determining genes play musical chairs. *Comptes Rendus Biologies*, 339(7–8), 258–262. doi:  
880 10.1016/j.crv.2016.05.010
- 881 Pan, Q., Feron, R., Yano, A., Guyomard, R., Jouanno, E., Vigouroux, E., ... Guiguen, Y. (2019). Identification  
882 of the master sex determining gene in Northern pike (*Esox lucius*) reveals restricted sex chromosome  
883 differentiation. *PLOS Genetics*, 15(8), e1008013. doi: 10.1371/journal.pgen.1008013
- 884 Pan, Q., Kay, T., Depincé, A., Adolphi, M., Scharl, M., Guiguen, Y., & Herpin, A. (2021). Evolution of master  
885 sex determiners: TGF- $\beta$  signalling pathways at regulatory crossroads. *Philosophical Transactions of*  
886 *the Royal Society of London. Series B, Biological Sciences*, 376(1832), 20200091. doi:  
887 10.1098/rstb.2020.0091
- 888 Pan, Z.-J., Li, X.-Y., Zhou, F.-J., Qiang, X.-G., & Gui, J.-F. (2015). Identification of Sex-Specific Markers  
889 Reveals Male Heterogametic Sex Determination in *Pseudobagrus ussuriensis*. *Marine Biotechnology*  
890 (*New York, N.Y.*), 17(4), 441–451. doi: 10.1007/s10126-015-9631-2
- 891 Pasquier, J., Cabau, C., Nguyen, T., Jouanno, E., Severac, D., Braasch, I., ... Bobe, J. (2016). Gene evolution  
892 and gene expression after whole genome duplication in fish: The PhyloFish database. *BMC Genomics*,  
893 17, 368. doi: 10.1186/s12864-016-2709-z
- 894 Phuong, N. T., & Oanh, D. T. H. (2010). Striped Catfish Aquaculture in Vietnam: A Decade of Unprecedented  
895 Development. In S. S. De Silva & F. B. Davy (Eds.), *Success Stories in Asian Aquaculture* (pp. 131–  
896 147). Dordrecht: Springer Netherlands. doi: 10.1007/978-90-481-3087-0\_7
- 897 Pouyaud, L., Gustiano, R., & Teugels, G. G. (2016). contribution to the phylogeny of the Pangasiidae based  
898 on mitochondrial 12S rDNA. *Indonesian Journal of Agricultural Science*, 5(2), 4562. doi:  
899 10.21082/ijas.v5n2.2004.p4562
- 900 Prysacz, L. P., & Gabaldón, T. (2016). Redundans: An assembly pipeline for highly heterozygous genomes.  
901 *Nucleic Acids Research*, 44(12), e113–e113. doi: 10.1093/nar/gkw294
- 902 Purcell, C. M., Seetharam, A. S., Snodgrass, O., Ortega-García, S., Hyde, J. R., & Severin, A. J. (2018).  
903 Insights into teleost sex determination from the *Seriola dorsalis* genome assembly. *BMC Genomics*,  
904 19(1), 31. doi: 10.1186/s12864-017-4403-1
- 905 Qu, M., Liu, Y., Zhang, Y., Wan, S., Ravi, V., Qin, G., ... Lin, Q. (2021). Seadragon genome analysis provides  
906 insights into its phenotype and sex determination locus. *Science Advances*, 7(34), eabg5196. doi:  
907 10.1126/sciadv.abg5196
- 908 Quinlan, A. R., & Hall, I. M. (2010). BEDTools: A flexible suite of utilities for comparing genomic features.  
909 *Bioinformatics (Oxford, England)*, 26(6), 841–842. doi: 10.1093/bioinformatics/btq033
- 910 Rafati, N., Chen, J., Herpin, A., Pettersson, M. E., Han, F., Feng, C., ... Andersson, L. (2020). Reconstruction  
911 of the birth of a male sex chromosome present in Atlantic herring. *Proceedings of the National*  
912 *Academy of Sciences*, 117(39), 24359–24368. doi: 10.1073/pnas.2009925117
- 913 Reichwald, K., Petzold, A., Koch, P., Downie, B. R., Hartmann, N., Pietsch, S., ... Platzer, M. (2015). Insights  
914 into Sex Chromosome Evolution and Aging from the Genome of a Short-Lived Fish. *Cell*, 163(6),  
915 1527–1538. doi: 10.1016/j.cell.2015.10.071
- 916 Roberts, T. R., & Vidhayanon, C. (1991). Systematic Revision of the Asian Catfish Family Pangasiidae, with  
917 Biological Observations and Descriptions of Three New Species. *Proceedings of the Academy of*

- 918 *Natural Sciences of Philadelphia*, 143, 97–143.
- 919 Rondeau, E. B., Messmer, A. M., Sanderson, D. S., Jantzen, S. G., von Schalburg, K. R., Minkley, D. R., ...  
920 Koop, B. F. (2013). Genomics of sablefish (*Anoplopoma fimbria*): Expressed genes, mitochondrial  
921 phylogeny, linkage map and identification of a putative sex gene. *BMC Genomics*, 14(1), 452. doi:  
922 10.1186/1471-2164-14-452
- 923 Ruan, J. (2019). *Ultra-fast de novo assembler using long noisy reads: Ruanjue/smartdenovo* [C]. Retrieved  
924 from <https://github.com/ruanjue/smartdenovo> (Original work published 2015)
- 925 Ruan, J., & Li, H. (2020). Fast and accurate long-read assembly with wtdbg2. *Nature Methods*, 17(2), 155–  
926 158. doi: 10.1038/s41592-019-0669-3
- 927 Sela, I., Ashkenazy, H., Katoh, K., & Pupko, T. (2015). GUIDANCE2: Accurate detection of unreliable  
928 alignment regions accounting for the uncertainty of multiple parameters. *Nucleic Acids Research*,  
929 43(W1), W7-14. doi: 10.1093/nar/gkv318
- 930 Shumate, A., & Salzberg, S. L. (2021). Liftoff: Accurate mapping of gene annotations. *Bioinformatics*, 37(12),  
931 1639–1643. doi: 10.1093/bioinformatics/btaa1016
- 932 Simão, F. A., Waterhouse, R. M., Ioannidis, P., Kriventseva, E. V., & Zdobnov, E. M. (2015). BUSCO:  
933 Assessing genome assembly and annotation completeness with single-copy orthologs. *Bioinformatics*,  
934 31(19), 3210–3212. doi: 10.1093/bioinformatics/btv351
- 935 Singh, A. K., & Lakra, W. S. (2012). Culture of Pangasianodon hypophthalmus into India: Impacts and present  
936 scenario. *Pakistan Journal of Biological Sciences: PJBs*, 15(1), 19–26. doi: 10.3923/pjbs.2012.19.26
- 937 Slater, G. S. C., & Birney, E. (2005). Automated generation of heuristics for biological sequence comparison.  
938 *BMC Bioinformatics*, 6, 31. doi: 10.1186/1471-2105-6-31
- 939 Song, W., Xie, Y., Sun, M., Li, X., Fitzpatrick, C. K., Vaux, F., ... He, Y. (2021). A duplicated amh is the  
940 master sex-determining gene for *Sebastes* rockfish in the Northwest Pacific. *Open Biology*, 11(7),  
941 210063. doi: 10.1098/rsob.210063
- 942 Sreeputhorn, K., Mangumphon, K., Muanphet, B., Tanomtong, A., Supiwong, W., & Kaewmad, P. (2017).  
943 *The First Report on Chromosome Analysis of F1 Hybrid Catfish: Mekong Giant Catfish (*  
944 *Pangasianodon gigas**) × Striped Catfish (**Pangasianodon hypophthalmus**) and Spot Pangasius (*  
945 *Pangasius larnaudii**) × Pangasianodon hypophthalmus (Siluriformes, Pangasiidae)*. doi:  
946 10.1508/CYTOLOGIA.82.457
- 947 Sriphairoj, K., Na-Nakorn, U., Brunelli, J. P., & Thorgaard, G. H. (2007). No AFLP sex-specific markers  
948 detected in *Pangasianodon gigas* and *P. hypophthalmus*. *Aquaculture*, 273(4), 739–743. doi:  
949 10.1016/j.aquaculture.2007.09.018
- 950 Stanke, M., Keller, O., Gunduz, I., Hayes, A., Waack, S., & Morgenstern, B. (2006). AUGUSTUS: Ab initio  
951 prediction of alternative transcripts. *Nucleic Acids Research*, 34(Web Server issue), W435-439. doi:  
952 10.1093/nar/gkl200
- 953 Sullivan, J. P., Lundberg, J. G., & Hardman, M. (2006). A phylogenetic analysis of the major groups of  
954 catfishes (Teleostei: Siluriformes) using rag1 and rag2 nuclear gene sequences. *Molecular*  
955 *Phylogenetics and Evolution*, 41(3), 636–662. doi: 10.1016/j.ympev.2006.05.044
- 956 Takehana, Y., Hamaguchi, S., & Sakaizumi, M. (2008). Different origins of ZZ/ZW sex chromosomes in  
957 closely related medaka fishes, *Oryzias javanicus* and *O. hubbsi*. *Chromosome Research: An*  
958 *International Journal on the Molecular, Supramolecular and Evolutionary Aspects of Chromosome*  
959 *Biology*, 16(5), 801–811. doi: 10.1007/s10577-008-1227-5
- 960 Takehana, Y., Matsuda, M., Myosho, T., Suster, M. L., Kawakami, K., Shin-I, T., ... Naruse, K. (2014). Co-  
961 option of Sox3 as the male-determining factor on the Y chromosome in the fish *Oryzias dancena*.  
962 *Nature Communications*, 5, 4157. doi: 10.1038/ncomms5157
- 963 Trapnell, C., Williams, B. A., Pertea, G., Mortazavi, A., Kwan, G., van Baren, M. J., ... Pachter, L. (2010).  
964 Transcript assembly and quantification by RNA-Seq reveals unannotated transcripts and isoform  
965 switching during cell differentiation. *Nature Biotechnology*, 28(5), 511–515. doi: 10.1038/nbt.1621
- 966 Vaser, R., Sović, I., Nagarajan, N., & Šikić, M. (2017). Fast and accurate de novo genome assembly from long  
967 uncorrected reads. *Genome Research*, 27(5), 737–746. doi: 10.1101/gr.214270.116
- 968 Villela, L. C. V., Alves, A. L., Varela, E. S., Yamagishi, M. E. B., Giachetto, P. F., da Silva, N. M. A., ...  
969 Caetano, A. R. (2017). Complete mitochondrial genome from South American catfish  
970 *Pseudoplatystoma reticulatum* (Eigenmann & Eigenmann) and its impact in Siluriformes phylogenetic  
971 tree. *Genetica*, 145(1), 51–66. doi: 10.1007/s10709-016-9945-7
- 972 Vurture, G. W., Sedlazeck, F. J., Nattestad, M., Underwood, C. J., Fang, H., Gurtowski, J., & Schatz, M. C.

- 973 (2017). GenomeScope: Fast reference-free genome profiling from short reads. *Bioinformatics (Oxford,*  
974 *England)*, 33(14), 2202–2204. doi: 10.1093/bioinformatics/btx153
- 975 Walker, B. J., Abeel, T., Shea, T., Priest, M., Abouelliel, A., Sakthikumar, S., ... Earl, A. M. (2014). Pilon:  
976 An integrated tool for comprehensive microbial variant detection and genome assembly improvement.  
977 *PloS One*, 9(11), e112963. doi: 10.1371/journal.pone.0112963
- 978 Wang, D., Mao, H.-L., Chen, H.-X., Liu, H.-Q., & Gui, J.-F. (2009). Isolation of Y- and X-linked SCAR  
979 markers in yellow catfish and application in the production of all-male populations. *Animal Genetics*,  
980 40(6), 978–981. doi: 10.1111/j.1365-2052.2009.01941.x
- 981 Yang, Z., Nielsen, R., Goldman, N., & Pedersen, A. M. (2000). Codon-substitution models for heterogeneous  
982 selection pressure at amino acid sites. *Genetics*, 155(1), 431–449. doi: 10.1093/genetics/155.1.431
- 983 Yano, A., Guyomard, R., Nicol, B., Jouanno, E., Quillet, E., Klopp, C., ... Guiguen, Y. (2012). An Immune-  
984 Related Gene Evolved into the Master Sex-Determining Gene in Rainbow Trout, *Oncorhynchus*  
985 *mykiss*. *Current Biology*, 22(15), 1423–1428. doi: 10.1016/j.cub.2012.05.045
- 986 Yano, A., Nicol, B., Jouanno, E., Quillet, E., Fostier, A., Guyomard, R., & Guiguen, Y. (2013). The sexually  
987 dimorphic on the Y-chromosome gene (sdY) is a conserved male-specific Y-chromosome sequence  
988 in many salmonids. *Evolutionary Applications*, 6(3), 486–496. doi: 10.1111/eva.12032
- 989 Zhang, J., Nielsen, R., & Yang, Z. (2005). Evaluation of an improved branch-site likelihood method for  
990 detecting positive selection at the molecular level. *Molecular Biology and Evolution*, 22(12), 2472–  
991 2479. doi: 10.1093/molbev/msi237

992

## 993 **AUTHOR CONTRIBUTIONS**

994 YG, and JHP designed the project. JCA, RD, MC, TTTH, RG, KS, JR and FLA collected the samples,  
995 EJ, MW, CI, AC, CR, OB, SV, CL, CP, EB, VG and HA extracted the gDNA, made the genomic  
996 libraries and sequenced them. CC, CK, MZ, MW, QP and YG processed the genome assemblies and  
997 / or analyzed the results. TD, JM and JB processed and analyzed the small RNA sequencing data for  
998 miRNA analysis. CFB, MW, QP and MRR performed phylogenetic analyses. CFB and MRR  
999 performed the selection analysis. MW, JHP, CC, CK, CR, QP and YG wrote the manuscript with  
1000 inputs from all other coauthors. JHP, CD, JB and YG, supervised the project administration and raised  
1001 funding. All the authors read and approved the final manuscript.

1002

## 1003 **COMPETING INTERESTS**

1004 All authors declare no competing interests.

1005

1006

1007

1008

1009

1010 **FIGURES**

1011

1012

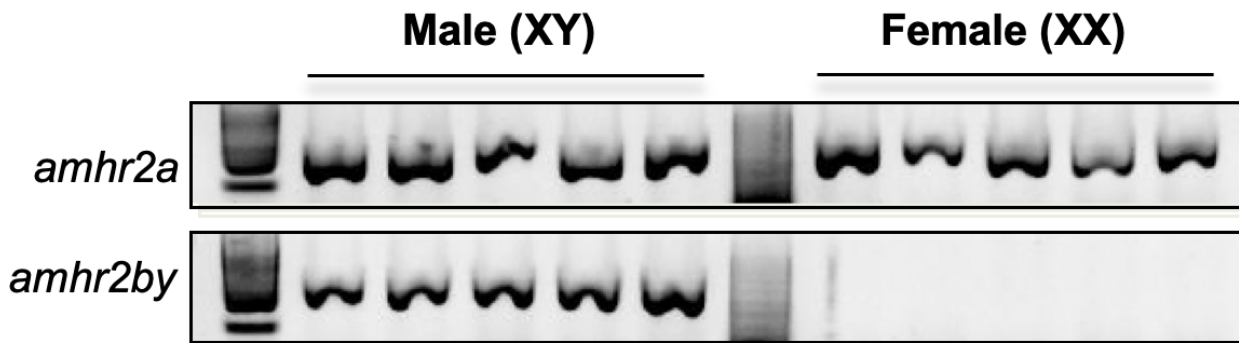

1013

1014 **Figure 1. Sex genotyping in *P. hypophthalmus*.** The *amhr2a* sequence (upper panel) is PCR  
1015 amplified in both male and female samples, while the *amh2by* sequence (bottom panel) is only  
1016 amplified in male samples, indicating that *amhr2by* is male-specific i.e., Y-chromosome linked.

1017

1018

1019

1020

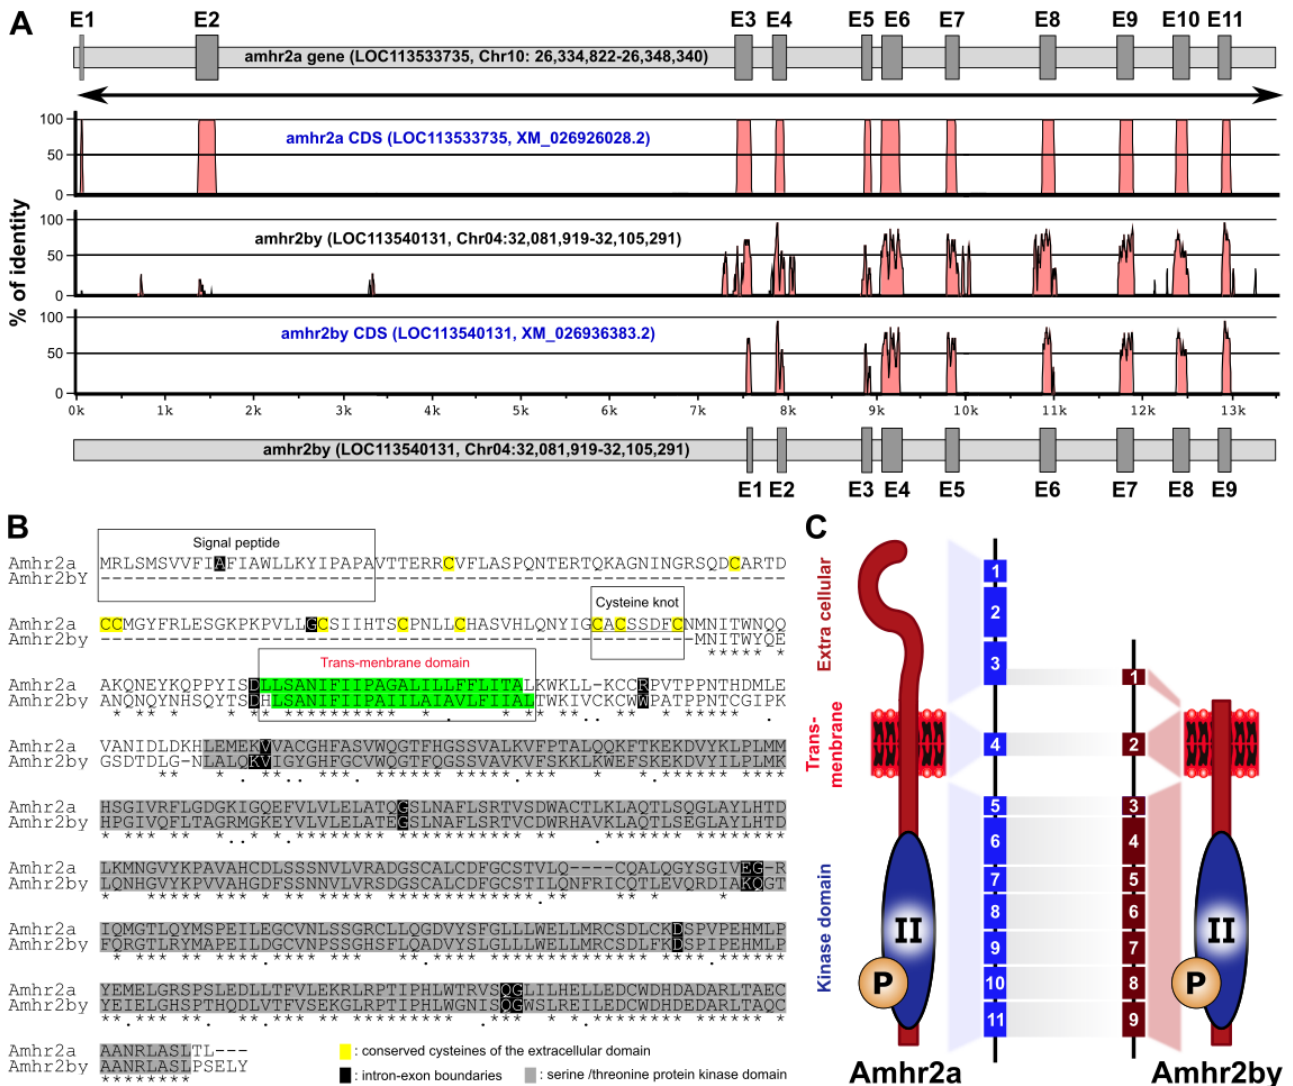

1021

1022

1023

1024

1025

1026

1027

1028

1029

1030

1031

1032

1033

1034

**Figure 2. Structure of *amhr2a* and *amhr2by* and deduced proteins in *P. hypophthalmus*.** (A) Identity plot of the alignment of the autosomal *amhr2a* with the Y-linked *amhr2by* sequences. Exons (E) of both *amhr2* genes are depicted with gray boxes. (B) Clustal W alignment of Amhr2a and Amhr2by proteins. Identical amino acids are shaded in gray and conserved cysteines in the extracellular domain of Amhr2a are highlighted in yellow. The different domains (signal peptide, cysteine knot and transmembrane domain) of the receptors are boxed. Intron-exon boundaries are boxed in black for both receptors. (C) Schematic representation of *P. hypophthalmus* autosomal Amhr2a and Y-linked Amhr2bY proteins showing the architecture of Amh receptors and the correspondence between exons of Amhr2a and Amhr2by, highlighting the absence of the entire extracellular domain in the truncated Amhr2bY.

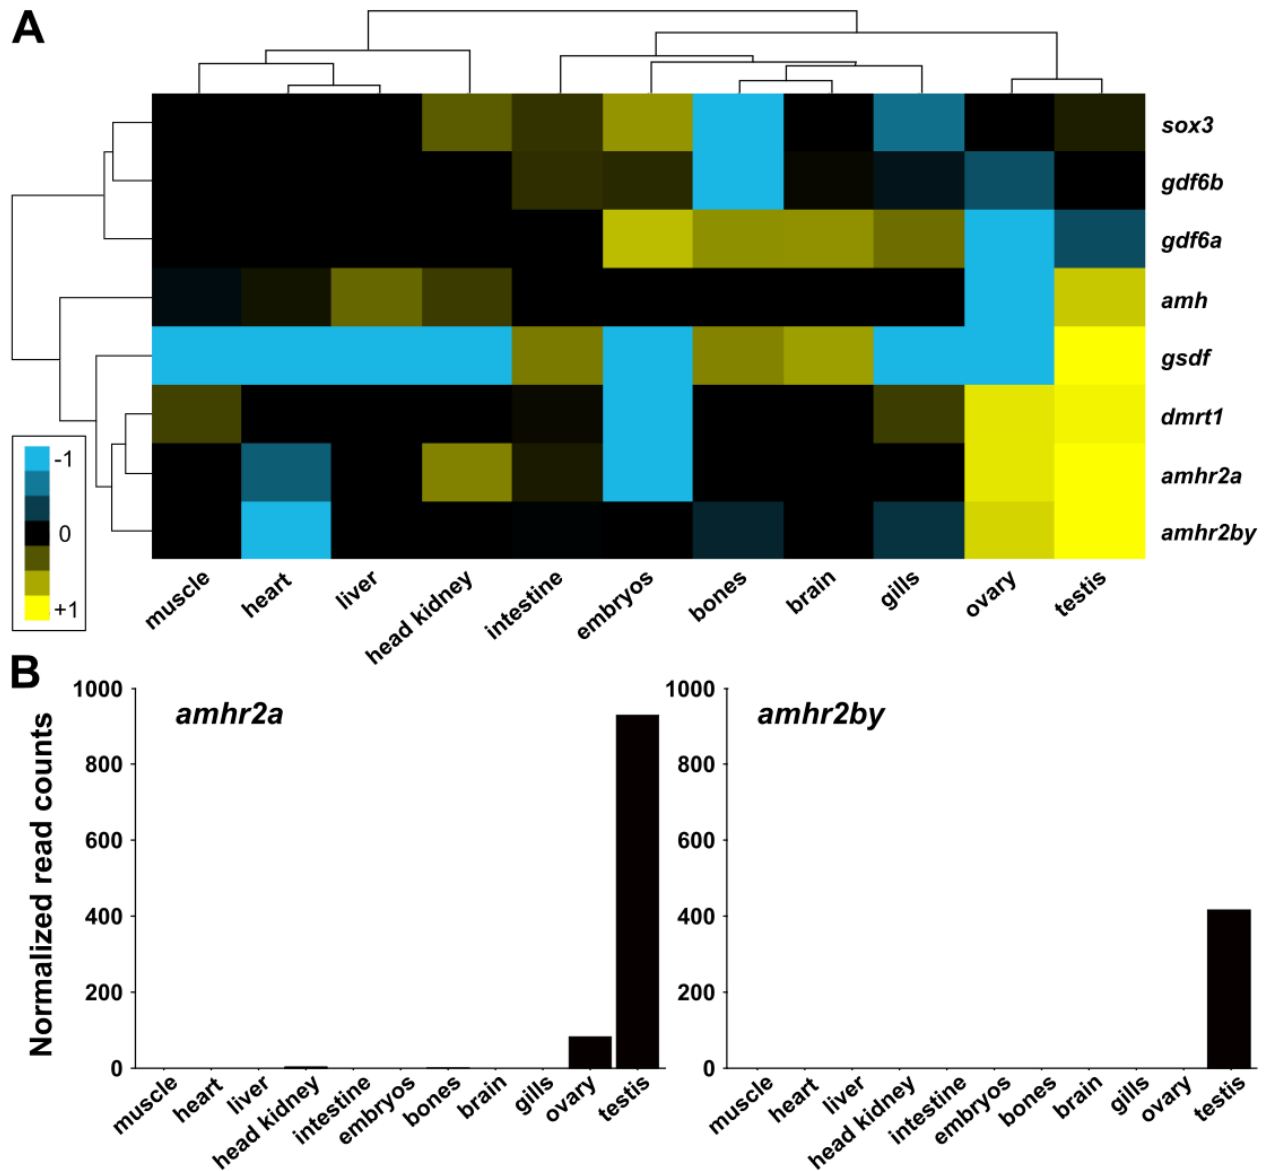

1035

1036

1037

1038

1039

1040

1041

1042

**Figure 3. Expression of some sex determination candidate genes in adult organs of *P. hypophthalmus*.** (A) Hierarchical clustering heatmap analysis of some sex determination genes previously identified in other teleosts, i.e., *amh*, *amhr2*, *dmrt1*, *gsdf*, *gdf6a*, *gdf6b* and *sox3* in different organs and embryos of *P. hypophthalmus*. Each colored cell corresponds to a relative expression value (see color legend on the left). (B) Normalized read counts of *amhr2a* and *amhr2by* in whole organs and embryos *P. hypophthalmus* transcriptomes.

1043

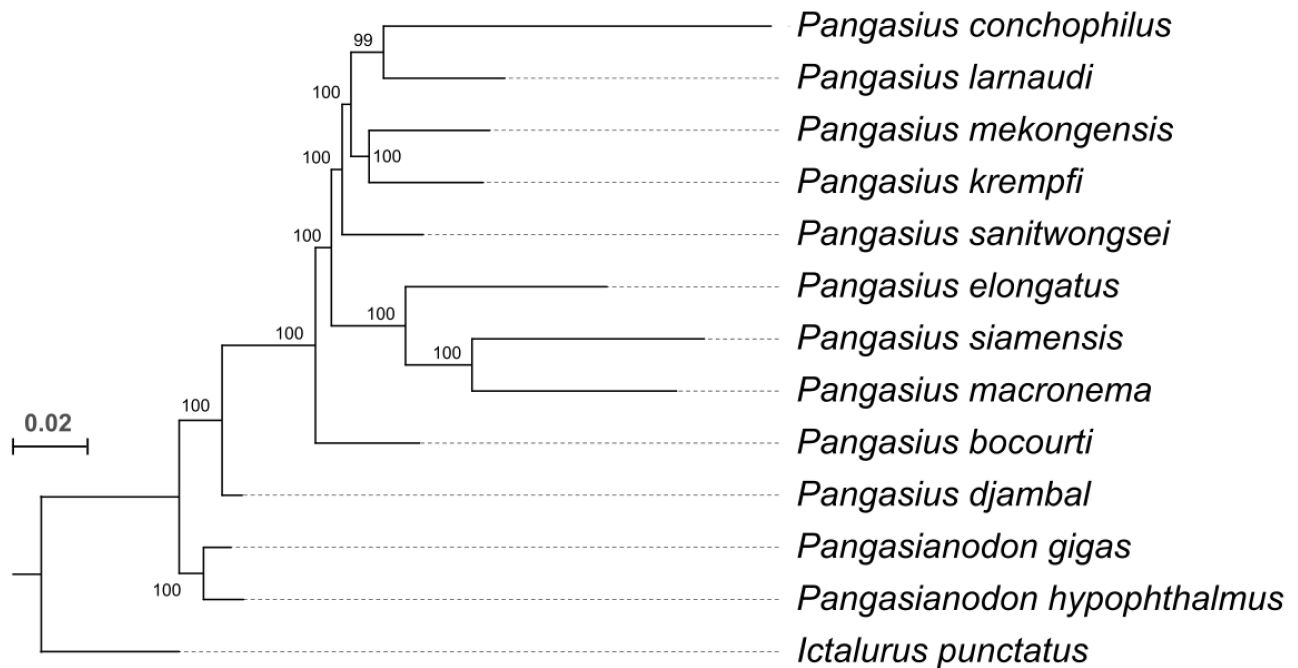

1044

1045 **Figure 4: Whole-genome-based phylogenetic tree of all sequenced Pangasiid species.** Maximum-  
1046 likelihood phylogeny of 12 Pangasiidae species with *Ictalurus punctatus* (siluriformes) as a  
1047 Pangasiidae outgroup, based on alignment of concatenated protein sequences. Branch length scale  
1048 corresponds to 0.02 amino acid substitutions per site. Support values at each node are proportions of  
1049 100 standard non-parametric bootstrap replicates.

1050

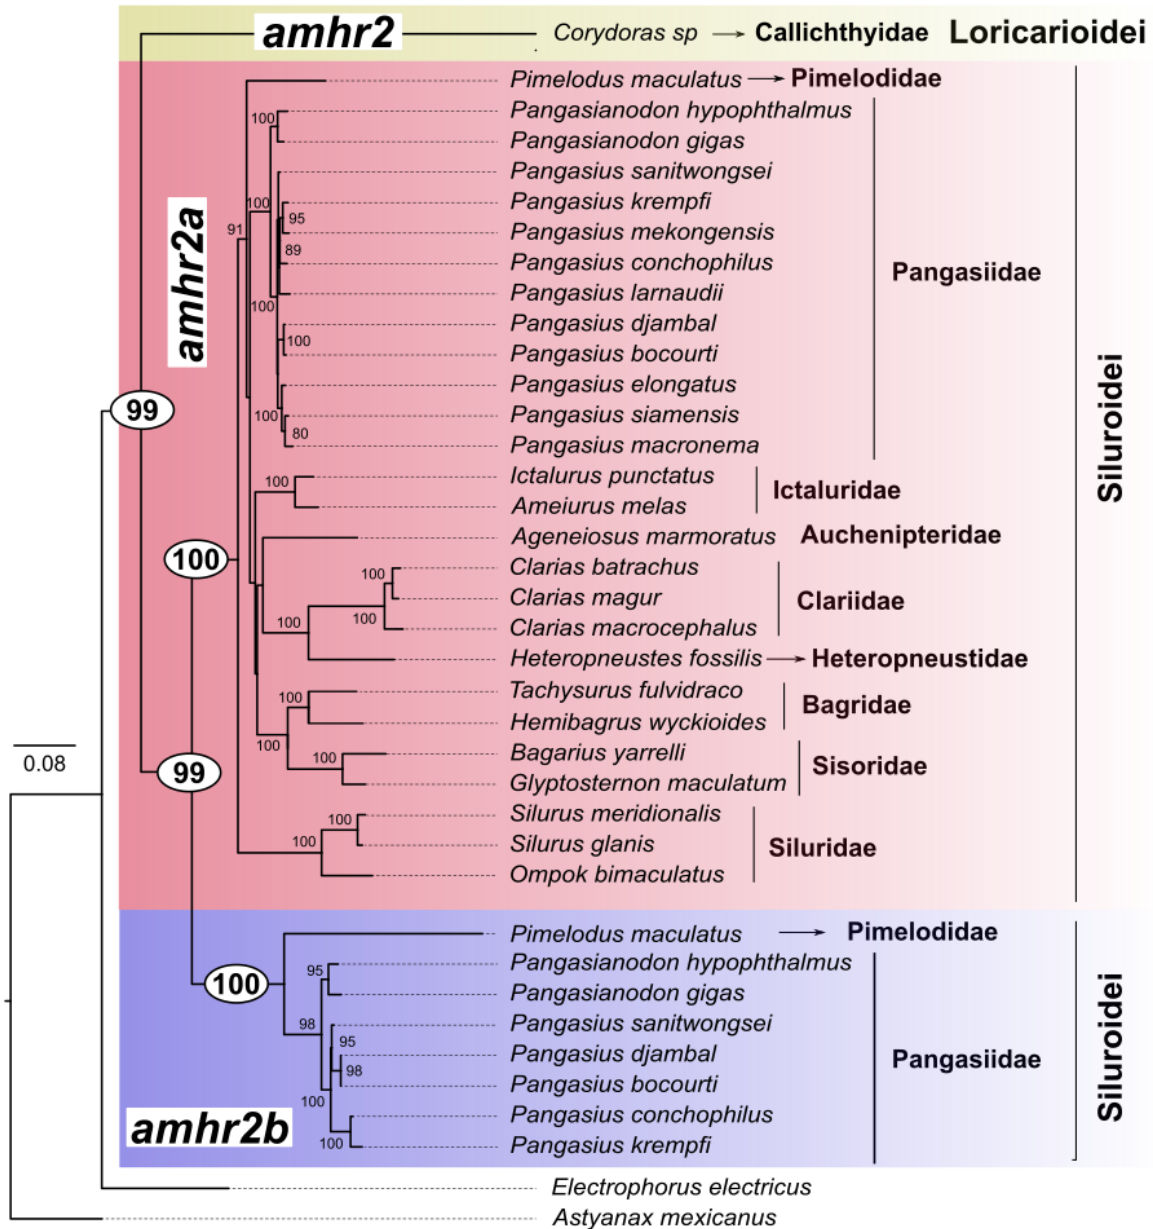

1051

1052

1053

1054

1055

1056

1057

1058

1059

1060

1061

**Figure 5. Phylogeny of *amhr2* in catfishes reveals an ancient *amhr2a* / *amhr2b* duplication in Siluroidei.** Maximum-likelihood phylogeny of *amhr2* coding sequences (see Supplementary Figure 1 for other phylogenetic approaches) from 28 catfish species with *amhr2* coding sequences from *Astyanax mexicanus* (Characiformes) and *Electrophorus electricus* (Gymnotiformes) as Siluriformes outgroups. Family and suborders are given for all catfish species on the right panel of the figure. The *amhr2b* cluster including the *amhr2by* of Pangasiids is shaded in purple, the *amhr2a* cluster shaded in red, and the *Corydorax sp.* *amhr2* pre-duplication is shaded in yellow. The branch length scale representing the number of substitutions per site is given at the root of the Siluriformes tree. Bootstrap values are given only for values over 80 and are inserted in a white circle at key nodes for the Siluroidei *amhr2* duplication.



1062

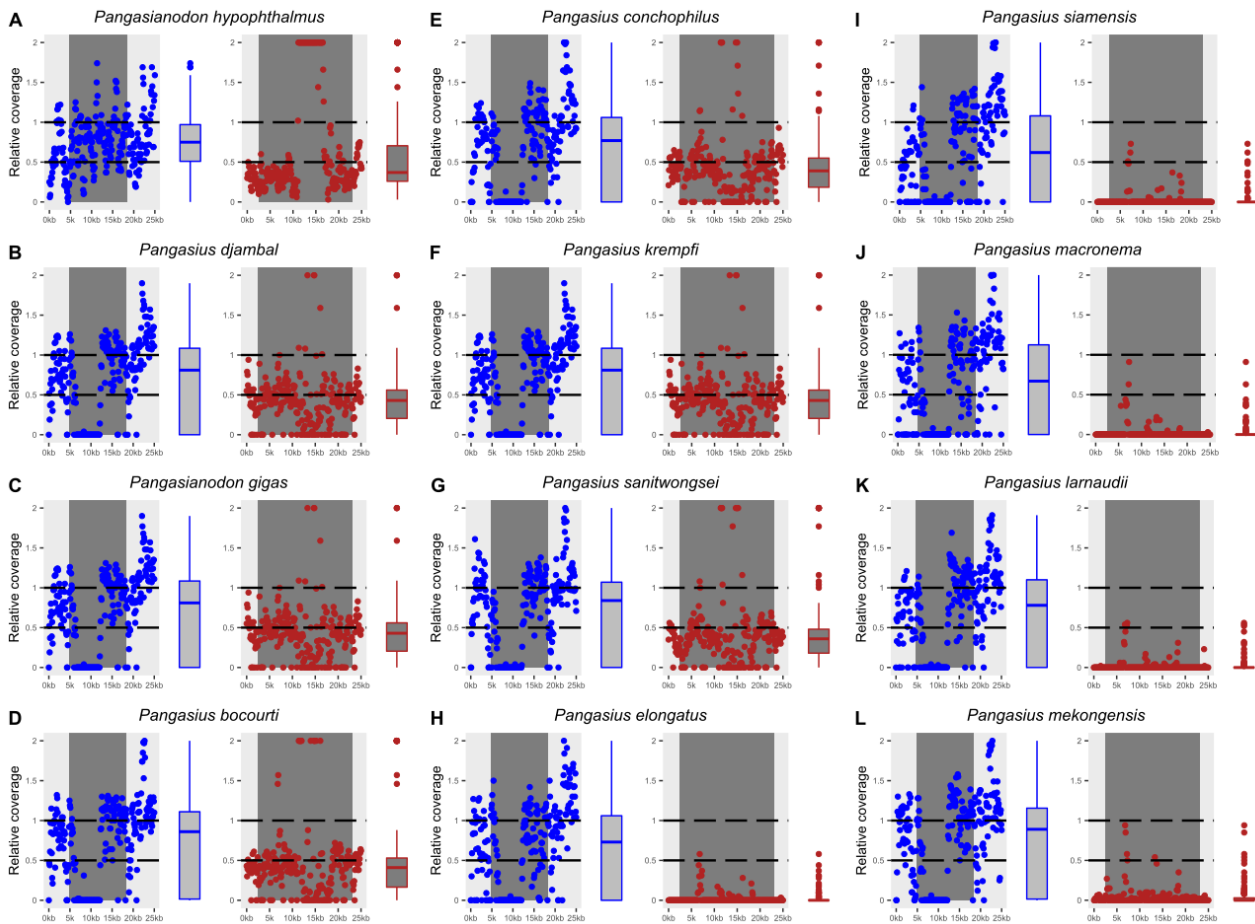

1063

1064 **Supplementary Figure 1. Relative genome read coverage around the *amhr2a* and *amhr2by* loci**  
1065 **in 12 Pangasiids supports hemizyosity of *amhr2by* in some species.** (A-L) Relative average read  
1066 coverage was deduced from each species short-read remapping on the *P. hypophthalmus*  
1067 genome reference and is shown in blue for the autosomal *amhr2a* locus and in red for the  
1068 *amhr2by* locus (left and right side respectively of each species panel). Half read coverage  
1069 was detected around the *amhr2by* locus compared to the *amhr2a* locus in the male genomes of  
1070 *P. hypophthalmus*, *P. gigas*, *P. djambal*, *P. conchophilus*, and *P. bocourti* (A-E) and in the unknown  
1071 sex genomes of *P. sanitwongsei*, and *P. krempfi* (F-G), supporting hemizyosity of *amhr2by* in these  
1072 species as it would be expected for a Y chromosomal gene. In *P. elongatus*, *P. siamensis*, *P.*  
1073 *macronema*, *P. larnaudii*, and *P. mekongensis* (H-L) no reads were significantly remapped on the  
1074 *P. hypophthalmus amhr2by* locus either because these sequenced individuals are XX females without a  
1075 Y chromosome *amhr2by* gene, or because these species have lost *amhr2by* as a Y chromosome gene.  
1076

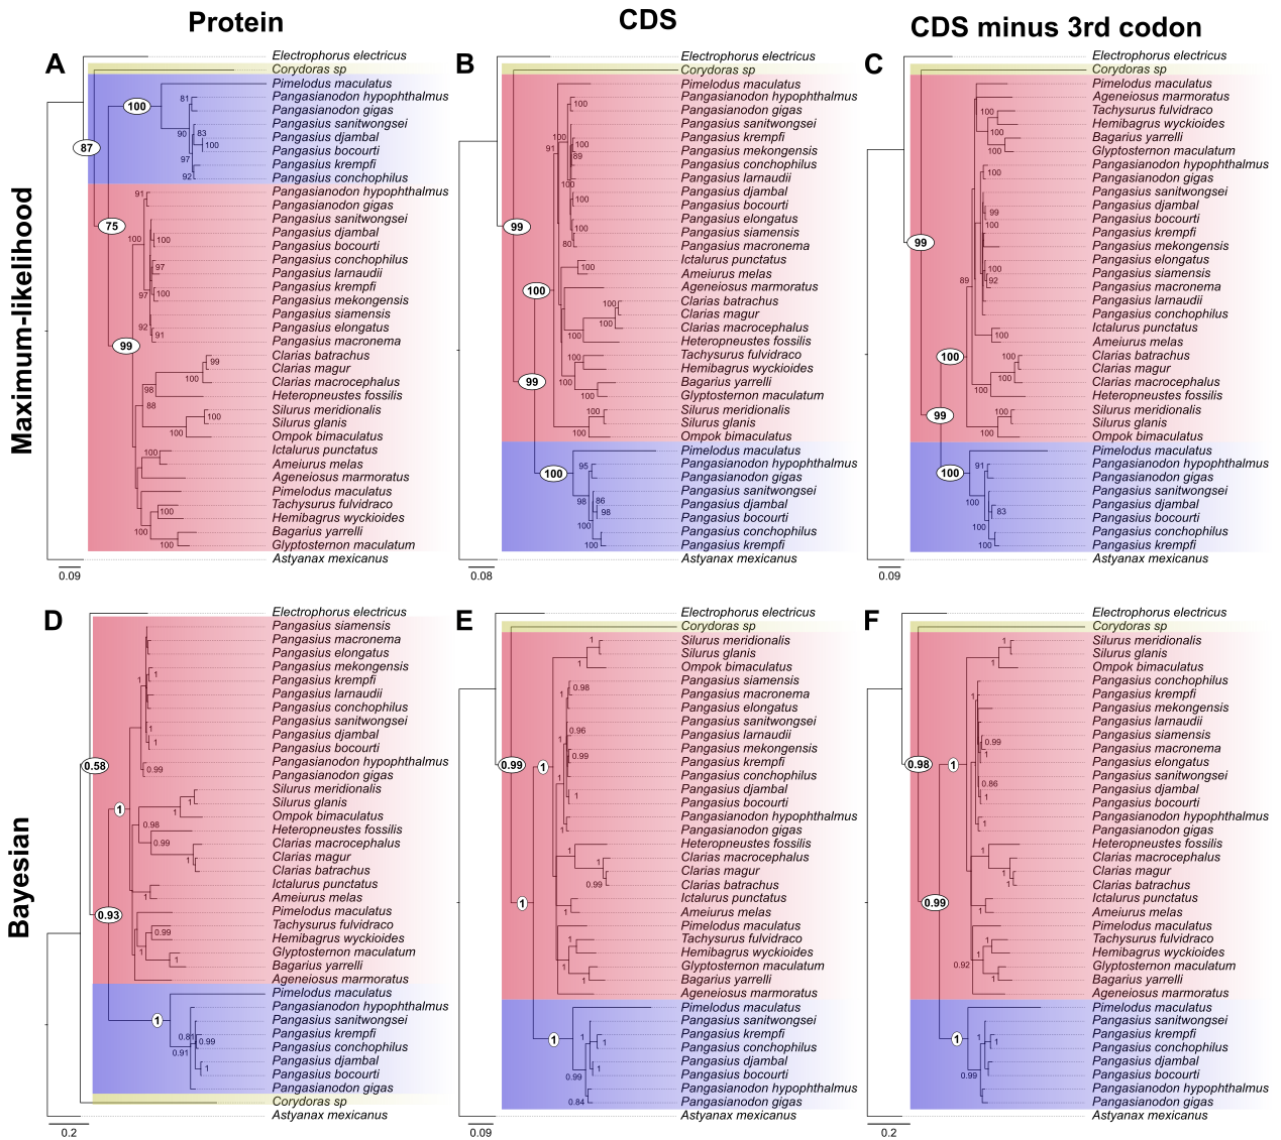

1077

1078

1079

1080

1081

1082

1083

1084

1085

1086

1087

1088

1089

**Supplementary Figure 2. Phylogenies of Amhr2 / amhr2 in catfishes support an ancient amhr2a / amhr2b duplication in Siluroidei.** Maximum-likelihood (A, B, C) and Bayesian (D, E, F) phylogenies of Amhr2 proteins (A, D), amhr2 coding (CDS) sequences (B, E) and amhr2 CDS sequences with the third codon removed (C, F) from 28 catfish species with sequences from *Astyanax mexicanus* (Characiformes) and *Electrophorus electricus* (Gymnotiformes) as Siluriformes outgroups. The amhr2b cluster including the amhr2by of Pangasiids is shaded in purple, the amhr2a cluster shaded in red, and the *Corydorax sp* amhr2 pre-duplication is shaded in yellow. The branch length scale representing the number of substitutions per site is given below each tree. Bootstrap values are given only for values over 80 except at key nodes for the Siluroidei amhr2 duplication (white circles).

1090 **TABLES**

1091 **Table 1: Comparison of our *P. hypophthalmus* reference genome assembly metrics (our study)**  
 1092 **with the other *P. hypophthalmus* available assemblies.**

| Assemblies                                   | GCA_003671635.1 | Our study  | GCA_016801045.1 |
|----------------------------------------------|-----------------|------------|-----------------|
| Release date                                 | 05/04/2018      | 10/22/2019 | 14/10/2020      |
| Sex of the sequenced individual              | male            | male       | female          |
| Total sequence length                        | 715.8 Mb        | 758.9 Mb   | 742.5 Mb        |
| Total ungapped length                        | 696.5 Mb        | 758.8 Mb   | 742.3 Mb        |
| Number of contigs                            | 23,34           | 612        | 808             |
| Contig N50                                   | 0.06 Mb         | 16.19 Mb   | 3.48 Mb         |
| Contig L50                                   | 3,254           | 18         | 63              |
| Total number of chromosomes                  | N.A             | 30         | 30              |
| Number of component sequences (WGS or clone) | 568             | 150        | 402             |

1093 N.A = Not Applicable

1094 **Table 2: Sex-linkage of *amhr2by* in five different Pangasiid species.** Associations between  
 1095 *amhr2by* specific PCR amplifications and sex phenotypes are provided for both males and females  
 1096 (number of positive individuals for *amhr2by*/total number of individuals) along with the p value of  
 1097 association with sex that was calculated for each species based on the Pearson's Chi-square test with  
 1098 Yates' continuity correction.

| Species                            | males | females | p value   |
|------------------------------------|-------|---------|-----------|
| <i>Pangasianodon hypophthalmus</i> | 12/12 | 1/11    | 7.12e-05  |
| <i>Pangasianodon gigas</i>         | 3/3   | 1/3     | 0.3865*   |
| <i>Pangasius bocourti</i>          | 12/12 | 1/20    | 8.411e-07 |
| <i>Pangasius conchophilus</i>      | 22/22 | 0/10    | 1.559e-07 |
| <i>Pangasius djambal</i>           | 6/6   | 0/9     | 8.528e-04 |

1099 \* non-significant association with sex

1100 **Table 3: Positive selection analyses reveal no significant signal of positive selection on Pangasiid**  
 1101 ***amhr2*.** P-values were computed using a chi-square distribution with 1 degree of freedom. None of  
 1102 the p-values passed a Bonferroni corrected limit of significance:  $0.05/3 = 0.0167$ . DlnL = difference  
 1103 in log-likelihood between models with and without positive selection; likelihood ratio test statistic.

| Model             | Conserved exons |           | First exons |              |
|-------------------|-----------------|-----------|-------------|--------------|
|                   | DlnL            | p-value   | DlnL        | p-value      |
| M8 gamma          | 0.0000000       | 0.5000000 | 3.37482     | 3.309990e-02 |
| Branch-site gamma | 0.2976536       | 0.2926786 | -           | -            |

1104

**Supplementary Table 1: Genome assembly characteristics and annotation metrics of 12 Pangasiid species.**

| Species                            | Sex  | Sequencing/assembly                                    | Guided assembly | N      | G.S (Gb) | Max (Mb) | N50 (Mb) | L50 | % Chr | Annotation                             | Buscos (C) | Buscos (S) | Buscos (D) | Buscos (F) | Buscos (M) |
|------------------------------------|------|--------------------------------------------------------|-----------------|--------|----------|----------|----------|-----|-------|----------------------------------------|------------|------------|------------|------------|------------|
| <i>Pangasianodon hypophthalmus</i> | male | ONT, 10X, Hi-C<br>Smartdenovo/lonranger/juicer         | N.A             | 612    | 0.759    | 35.6     | 26.16    | 13  | 99.2  | de novo / GenBank                      | 96.6       | 95.6       | 1.0        | 1.0        | 2.4        |
| <i>Pangasianodon gigas</i>         | male | Illumina 2x 250 bp<br>Discovar de novo                 | Dgenies         | 283151 | 0.841    | 35.47    | 26.7     | 12  | 89.0  | de novo /<br>in house                  |            |            |            |            |            |
| <i>Pangasius djambal</i>           | male | Illumina 2x 250 bp<br>Discovar de novo                 | Dgenies         | 415588 | 0.867    | 34.66    | 28.07    | 11  | 82.7  | de novo /<br>in house                  |            |            |            |            |            |
| <i>Pangasius conchophilus</i>      | male | Illumina 2 x150 bp<br>SPADes v.3.11.1 /purge_dup       | Dgenies         | 937794 | 0.815    | 30.1     | 17.57    | 18  | 73.0  | Lifted from<br><i>P. hypophthalmus</i> | 81.9       | 80.7       | 1.2        | 6.2        | 11.9       |
| <i>Pangasius bocourti</i>          | male | Illumina 2 x150 bp<br>SPADes v.3.11.1 /purge_dup       | Dgenies         | 740730 | 0.780    | 33.3     | 24.19    | 14  | 86.7  | Lifted from<br><i>P. hypophthalmus</i> | 95.5       | 94.6       | 0.9        | 1.4        | 3.1        |
| <i>Pangasius elongatus</i>         | U    | Illumina 2x150 bp<br>SPADes v.3.14.1 /redundans v0.14a | Dgenies         | 126560 | 0.712    | 31.0     | 22.43    | 14  | 87.6  | Lifted from<br><i>P. hypophthalmus</i> | 90.7       | 89.8       | 0.9        | 3.1        | 6.2        |
| <i>Pangasius siamensis</i>         | U    | Illumina 2x150 bp<br>SPADes v.3.14.1 /redundans v0.14a | Dgenies         | 53159  | 0.685    | 32.4     | 23.59    | 13  | 95.4  | Lifted from<br><i>P. hypophthalmus</i> | 93.0       | 92.0       | 1.0        | 2.1        | 4.9        |
| <i>Pangasius sanitwongsei</i>      | U    | Illumina 2 x150 bp<br>SPADes v.3.11.1 /purge_dup       | Dgenies         | 387468 | 0.743    | 34.1     | 24.55    | 14  | 92.4  | Lifted from<br><i>P. hypophthalmus</i> | 96.3       | 95.6       | 0.7        | 1.1        | 2.6        |
| <i>Pangasius macronema</i>         | U    | Illumina 2x150 bp<br>SPADes v.3.14.1 /redundans v0.14a | Dgenies         | 42101  | 0.683    | 32.4     | 23.73    | 13  | 95.9  | Lifted from<br><i>P. hypophthalmus</i> | 93.2       | 91.9       | 1.3        | 2.3        | 4.5        |
| <i>Pangasius larnaudii</i>         | U    | Illumina 2 x150 bp<br>SPADes v.3.11.1 /purge_dup       | Dgenies         | 375123 | 0.733    | 33.0     | 23.84    | 14  | 91.3  | Lifted from<br><i>P. hypophthalmus</i> | 95.6       | 94.8       | 0.8        | 1.5        | 2.9        |
| <i>Pangasius mekongensis</i>       | U    | Illumina 2 x150 bp<br>SPADes v.3.11.1 /purge_dup       | Dgenies         | 443231 | 0.766    | 33.7     | 24.28    | 14  | 88.8  | Lifted from<br><i>P. hypophthalmus</i> | 93.6       | 92.8       | 0.8        | 2.5        | 3.9        |
| <i>Pangasius krempfi</i>           | U    | Illumina 2 x150 bp<br>SPADes v.3.11.1 /purge_dup       | Dgenies         | 448669 | 0.739    | 33.5     | 24.31    | 14  | 91.3  | Lifted from<br><i>P. hypophthalmus</i> | 95.1       | 94.2       | 0.9        | 1.8        | 3.1        |

Sex = phenotypic sex of the animal sequenced (U= unknown), N= Number of contigs, G.S = genome assembly size (kb), Max = size of the longest scaffold, N50 = scaffold N50 (Mb), L50 = scaffold L50, % Chr = percentage of the assembly in chromosomes, Buscos (V4, in genome mode with actinopterygii lineage) score in percentage (C = Complete, S = Single copy, D = Duplicated, F = Fragmented, M = Missing). N.A = Not Applicable.

## Supplementary Table 2: Origin of the catfish *amhr2* sequences used for phylogenetic analyses.

| Species                            | Family           | Sub-order     | order         | Sex     | Gene                            | Source                                                                                          | Sequences deduced from                  |
|------------------------------------|------------------|---------------|---------------|---------|---------------------------------|-------------------------------------------------------------------------------------------------|-----------------------------------------|
| <i>Pangasianodon hypophthalmus</i> | Pangasiidae      | Siluroidei    | Siluriformes  | male    | <i>amhr2a</i><br><i>amhr2by</i> | This study                                                                                      | Genome annotation                       |
| <i>Pangasianodon gigas</i>         | Pangasiidae      | Siluroidei    | Siluriformes  | male    | <i>amhr2a</i><br><i>amhr2by</i> | This study                                                                                      | Genome annotation                       |
| <i>Pangasius djambal</i>           | Pangasiidae      | Siluroidei    | Siluriformes  | male    | <i>amhr2a</i><br><i>amhr2by</i> | This study                                                                                      | Genome annotation                       |
| <i>Pangasius conchophilus</i>      | Pangasiidae      | Siluroidei    | Siluriformes  | male    | <i>amhr2a</i><br><i>amhr2by</i> | This study                                                                                      | Genome annotation                       |
| <i>Pangasius bocourti</i>          | Pangasiidae      | Siluroidei    | Siluriformes  | male    | <i>amhr2a</i><br><i>amhr2by</i> | This study                                                                                      | Genome annotation                       |
| <i>Pangasius elongatus</i>         | Pangasiidae      | Siluroidei    | Siluriformes  | unknown | <i>amhr2a</i>                   | This study                                                                                      | Genome annotation                       |
| <i>Pangasius siamensis</i>         | Pangasiidae      | Siluroidei    | Siluriformes  | unknown | <i>amhr2a</i>                   | This study                                                                                      | Genome annotation                       |
| <i>Pangasius sanitwongsei</i>      | Pangasiidae      | Siluroidei    | Siluriformes  | unknown | <i>amhr2a</i><br><i>amhr2by</i> | This study                                                                                      | Genome annotation                       |
| <i>Pangasius macronema</i>         | Pangasiidae      | Siluroidei    | Siluriformes  | unknown | <i>amhr2a</i>                   | This study                                                                                      | Genome annotation                       |
| <i>Pangasius larnaudii</i>         | Pangasiidae      | Siluroidei    | Siluriformes  | unknown | <i>amhr2a</i>                   | This study                                                                                      | Genome annotation                       |
| <i>Pangasius mekongensis</i>       | Pangasiidae      | Siluroidei    | Siluriformes  | unknown | <i>amhr2a</i>                   | This study                                                                                      | Genome annotation                       |
| <i>Pangasius krempfi</i>           | Pangasiidae      | Siluroidei    | Siluriformes  | unknown | <i>amhr2a</i><br><i>amhr2by</i> | This study                                                                                      | Genome annotation                       |
| <i>Clarias batrachus</i>           | Clariidae        | Siluroidei    | Siluriformes  | unknown | <i>amhr2a</i>                   | GCA_003987875.1                                                                                 | inferred from genome assembly           |
| <i>Clarias macrocephalus</i>       | Clariidae        | Siluroidei    | Siluriformes  | female  | <i>amhr2a</i>                   | GCA_011419295.1                                                                                 | inferred from genome assembly           |
| <i>Clarias magur</i>               | Clariidae        | Siluroidei    | Siluriformes  | male    | <i>amhr2a</i>                   | GCA_013621035.1                                                                                 | inferred from genome assembly           |
| <i>Bagarius yarrelli</i>           | Sisoridae        | Siluroidei    | Siluriformes  | female  | <i>amhr2a</i>                   | GCA_005784505.1                                                                                 | inferred from genome assembly           |
| <i>Glyptosternon maculatum</i>     | Sisoridae        | Siluroidei    | Siluriformes  | female  | <i>amhr2a</i>                   | <a href="http://gigadb.org/dataset/view/id/100489">http://gigadb.org/dataset/view/id/100489</a> | inferred from genome assembly           |
| <i>Silurus glanis</i>              | Siluridae        | Siluroidei    | Siluriformes  | female  | <i>amhr2a</i>                   | GCA_014706435.1                                                                                 | inferred from genome assembly           |
| <i>Silurus meridionalis</i>        | Siluridae        | Siluroidei    | Siluriformes  | female  | <i>amhr2a</i>                   | GCA_014805685.1                                                                                 | KAF7704051.1                            |
| <i>Ompok bimaculatus</i>           | Siluridae        | Siluroidei    | Siluriformes  | unknown | <i>amhr2a</i>                   | GCA_009108245.1                                                                                 | inferred from genome assembly           |
| <i>Hemibagrus wyckioides</i>       | Bagridae         | Siluroidei    | Siluriformes  | female  | <i>amhr2a</i>                   | GCA_019097595.1                                                                                 | KAG7327988.1                            |
| <i>Tachysurus fulvidraco</i>       | Bagridae         | Siluroidei    | Siluriformes  | female  | <i>amhr2a</i>                   | GCF_003724035.1                                                                                 | XP_027015428.1                          |
| <i>Ageneiosus marmoratus</i>       | Auchenipteridae  | Siluroidei    | Siluriformes  | male    | <i>amhr2a</i>                   | GCA_003347165.1                                                                                 | inferred from genome assembly           |
| <i>Heteropneustes fossilis</i>     | Heteropneustidae | Siluroidei    | Siluriformes  | male    | <i>amhr2a</i>                   | unpublished                                                                                     | Inferred from transcriptome information |
| <i>Ameiurus melas</i>              | Ictaluridae      | Siluroidei    | Siluriformes  | male    | <i>amhr2a</i>                   | GCA_012411365.1                                                                                 | KAF4083677.1                            |
| <i>Ictalurus punctatus</i>         | Ictaluridae      | Siluroidei    | Siluriformes  | female  | <i>amhr2a</i>                   | GCF_001660625.1                                                                                 | XP_017331275.1                          |
| <i>Pimelodus maculatus</i>         | Pimelodidae      | Siluroidei    | Siluriformes  | male    | <i>amhr2a</i><br><i>amhr2b</i>  | unpublished                                                                                     | inferred from genome assembly           |
| <i>Corydoras sp C115</i>           | Callichthyidae   | Loricarioidei | Siluriformes  | unknown | <i>amhr2</i>                    | GCA_019802505.1                                                                                 | inferred from genome assembly           |
| <i>Electrophorus electricus</i>    | Gymnotidae       | NR            | Gymnotiformes | unknown | <i>amhr2</i>                    | GCF_013358815.1                                                                                 | XP_035376390.1                          |
| <i>Astyanax mexicanus</i>          | Stethaprioninae  | NR            | Characiformes | female  | <i>amhr2</i>                    | GCF_000372685.2                                                                                 | XP_022538368.1                          |

NR : not relevant
